# Supplementary material for: Pharmacologically Induced Accommodation Palsy and the Bioelectrical Activity of the Muscular System: A Preliminary Investigation
Source: MDPI journal article supplement (doi:10.3390/diagnostics14090961), 2024-05-04
Supplement: s1 [file s1]

|                                                                                                                                                                                               |    |
|-----------------------------------------------------------------------------------------------------------------------------------------------------------------------------------------------|----|
| Table S1. Presentation of groups. ....                                                                                                                                                        | 2  |
| Table S2. Comparison of bioelectrical activity findings of masticatory and cervical spine muscles in emmetropic subjects and myopic subjects (Without Paralysis of Accommodation). ....       | 3  |
| Table S3. Comparison of bioelectrical activity findings of masticatory and cervical spine muscles in emmetropic subjects and myopic subjects (Accommodation Paralysis in The Right Eye). .... | 6  |
| Table S4. Comparison of bioelectrical activity findings of masticatory and cervical spine muscles in emmetropic subjects and myopic subjects (Accommodation Paralysis in The Left Eye). ....  | 9  |
| Table S5. Comparison of bioelectrical activity findings of masticatory and cervical spine muscles in emmetropic subjects. ....                                                                | 12 |
| Table S6. Comparison of bioelectrical activity findings of masticatory and cervical spine muscles in myopic subjects. ....                                                                    | 15 |
| Table S7. Comparison of bioelectrical activity findings of postural muscles and the arm muscles in emmetropic subjects and myopic subjects (Without Paralysis of Accommodation). ....         | 18 |
| Table S8. Comparison of bioelectrical activity findings of postural muscles and the arm muscles in emmetropic subjects and myopic subjects (Accommodation Paralysis in The Right Eye). ....   | 21 |
| Table S9. Comparison of bioelectrical activity findings of postural muscles and the arm muscles in emmetropic subjects and myopic subjects (Accommodation Paralysis in The Left Eye). ....    | 24 |
| Table S10. Comparison of bioelectrical activity findings of postural muscles and the arm muscles in emmetropic subjects. ....                                                                 | 27 |
| Table S11. Comparison of bioelectrical activity findings of postural muscles and the arm muscles in myopic subjects. ....                                                                     | 31 |

**Table S1.** Presentation of groups.

|                                          |                                  | Emmetropic Subjects<br>(n=8) |       | Myopic Subjects<br>(n=8) |       |                |      |       |      |
|------------------------------------------|----------------------------------|------------------------------|-------|--------------------------|-------|----------------|------|-------|------|
|                                          |                                  | Mean                         | SD    | Mean                     | SD    | test           | p    |       |      |
|                                          | female                           | 4                            |       | 3                        |       | x <sup>2</sup> | 0.28 |       |      |
|                                          | male                             | 4                            |       | 5                        |       |                |      |       |      |
|                                          | age                              | 25.13                        | 1.55  | 24.75                    | 2.19  | Z              | 0.06 | 0.96  |      |
| Mandibular<br>Range Of<br>Motion<br>(mm) | Best Corrected Visual Acuity     | R                            | n/a   | 1.0                      |       |                |      | n/a   |      |
|                                          |                                  | L                            | n/a   | 1.0                      |       |                |      | n/a   |      |
|                                          | Visual Acuity                    | R                            | 1.0   | n/a                      |       |                |      | n/a   |      |
|                                          |                                  | L                            | 1.0   | n/a                      |       |                |      | n/a   |      |
|                                          | Refractive Error<br>(Dsph)       | R                            | n/a   | -3.25                    | 1.79  |                |      | n/a   |      |
|                                          |                                  | L                            | n/a   | -2.78                    | 0.86  |                |      | n/a   |      |
|                                          | Intraocular Pressure (mmHg)      | R                            | 15.29 | 1.89                     | 16.00 | 1.15           | Z    | -0.06 | 0.95 |
|                                          |                                  | L                            | 16.14 | 2.04                     | 15.25 | 1.26           | Z    | 0.87  | 0.39 |
|                                          | Axial Length (mm)                | R                            | 24.71 | 0.67                     | 23.86 | 0.40           | Z    | -1.31 | 0.19 |
|                                          |                                  | L                            | 24.54 | 0.71                     | 23.71 | 0.35           | Z    | -0.87 | 0.38 |
|                                          | Pain Free Opening                |                              | 47.50 | 2.27                     | 53.57 | 7.93           | Z    | -1.45 | 0.15 |
|                                          | Mandibular Movement to The Right |                              | 12.38 | 3.11                     | 10.00 | 2.94           | Z    | 1.51  | 0.13 |
| Mandibular Movement to The Left          |                                  | 11.88                        | 2.85  | 10.43                    | 2.94  | Z              | 0.75 | 0.45  |      |
| Protrusion                               |                                  | 9.67                         | 2.25  | 7.83                     | 1.94  | Z              | 1.20 | 0.23  |      |

n—individuals in the sample; SD—standard deviation; R—right side; L—left side; Dsph—spherical diopter; mmHg—millimeters of mercury; µm—micrometer; mm—millimeter; x<sup>2</sup>—the Chi-square test; Z— the Mann-Whitney U test.

**Table S2.** Comparison of bioelectrical activity findings of masticatory and cervical spine muscles in emmetropic subjects and myopic subjects (Without Paralysis of Accommodation).

|                                              |             | Emmetropic Subjects |        | Myopic Subjects |        | U     | Z     | P    |
|----------------------------------------------|-------------|---------------------|--------|-----------------|--------|-------|-------|------|
|                                              |             | Mean                | SD     | Mean            | SD     |       |       |      |
| <b>Rest</b>                                  | TA-R        | 5.39                | 2.74   | 6.49            | 5.38   | 39.00 | -0.09 | 0.93 |
|                                              | TA-L        | 8.64                | 6.71   | 7.38            | 4.21   | 39.00 | 0.09  | 0.93 |
|                                              | TA-tot      | 7.02                | 3.99   | 6.93            | 4.54   | 39.00 | 0.09  | 0.93 |
|                                              | AsI-TA      | -15.86              | 30.94  | -13.02          | 31.95  | 37.00 | -0.26 | 0.79 |
|                                              | MM-R        | 3.91                | 2.91   | 3.97            | 3.39   | 39.00 | -0.09 | 0.93 |
|                                              | MM-L        | 3.77                | 3.83   | 5.86            | 8.66   | 37.00 | -0.26 | 0.79 |
|                                              | MM-tot      | 3.84                | 3.29   | 4.91            | 5.95   | 38.00 | -0.18 | 0.86 |
|                                              | AsI-MM      | 9.67                | 37.37  | -7.00           | 22.67  | 31.00 | 0.79  | 0.43 |
|                                              | AcI-R       | -18.14              | 38.49  | -18.09          | 39.86  | 39.00 | -0.09 | 0.93 |
|                                              | AcI-L       | -36.77              | 41.07  | -25.05          | 38.65  | 36.00 | -0.35 | 0.72 |
|                                              | AcI-tot     | -29.78              | 36.33  | -23.96          | 34.16  | 33.00 | -0.62 | 0.54 |
|                                              | POC         | 92.98               | 45.83  | 86.25           | 36.61  | 38.00 | 0.18  | 0.86 |
|                                              | TC          | -337.67             | 634.41 | 99.56           | 620.33 | 29.50 | -0.93 | 0.35 |
|                                              | SCM-R       | 3.66                | 1.41   | 2.89            | 1.61   | 20.00 | 1.77  | 0.08 |
|                                              | SCM-L       | 3.45                | 1.39   | 3.01            | 1.23   | 34.00 | 0.53  | 0.60 |
|                                              | SCM-tot     | 3.55                | 0.86   | 2.95            | 0.98   | 25.00 | 1.32  | 0.19 |
|                                              | AsI-SCM     | 3.52                | 26.76  | -3.92           | 27.43  | 29.00 | 0.97  | 0.33 |
|                                              | UT-R        | 8.33                | 7.43   | 5.31            | 3.43   | 35.00 | 0.44  | 0.66 |
|                                              | UT-L        | 10.14               | 12.96  | 3.81            | 1.22   | 26.00 | 1.24  | 0.22 |
|                                              | UT-tot      | 9.24                | 9.45   | 4.56            | 1.70   | 22.00 | 1.59  | 0.11 |
|                                              | AsI-UT      | -5.50               | 44.04  | 6.42            | 39.22  | 34.00 | -0.53 | 0.60 |
| <b>Clenching in The Intercuspal Position</b> | TA-R        | 178.86              | 81.31  | 142.63          | 43.19  | 30.00 | 0.88  | 0.38 |
|                                              | TA-L        | 167.54              | 88.51  | 150.33          | 52.85  | 38.00 | 0.18  | 0.86 |
|                                              | TA-tot      | 173.20              | 77.02  | 146.48          | 43.56  | 36.00 | 0.35  | 0.72 |
|                                              | AsI -TA     | 3.16                | 16.44  | -2.73           | 15.28  | 36.00 | 0.35  | 0.72 |
|                                              | FCI-TA-R    | 40.12               | 24.78  | 41.58           | 31.35  | 40.00 | 0.00  | 1.00 |
|                                              | FCI-TA-L    | 30.80               | 28.34  | 30.53           | 23.97  | 40.00 | 0.00  | 1.00 |
|                                              | FCI-TA -tot | 31.77               | 23.78  | 31.51           | 21.62  | 40.00 | 0.00  | 1.00 |
|                                              | FCSI-TA     | 17.16               | 35.12  | 10.38           | 34.45  | 37.00 | 0.26  | 0.79 |
|                                              | MM-R        | 220.49              | 162.32 | 297.11          | 204.74 | 31.00 | -0.79 | 0.43 |
|                                              | MM-L        | 189.96              | 123.40 | 261.62          | 191.41 | 31.00 | -0.79 | 0.43 |
|                                              | MM-tot      | 205.23              | 138.39 | 279.37          | 196.66 | 32.00 | -0.71 | 0.48 |
|                                              | AsI -MM     | 2.78                | 17.87  | 3.89            | 14.50  | 40.00 | 0.00  | 1.00 |
|                                              | AcI-R       | -1.63               | 29.26  | 22.78           | 34.00  | 21.00 | -1.68 | 0.09 |
|                                              | AcI-L       | -1.34               | 24.69  | 16.09           | 27.94  | 24.00 | -1.41 | 0.16 |
|                                              | AcI- tot    | -1.39               | 23.97  | 19.46           | 29.78  | 21.00 | -1.68 | 0.09 |
|                                              | FCI-MM-R    | 89.03               | 91.11  | 128.46          | 120.79 | 33.00 | -0.62 | 0.54 |
|                                              | FCI-MM-L    | 1869.68             | 5399.2 | 90.51           | 89.03  | 39.00 | 0.09  | 0.93 |
|                                              |             |                     | 2      |                 |        |       |       |      |
|                                              | FCI-MM-tot  | 81.57               | 69.38  | 104.47          | 100.56 | 37.00 | -0.26 | 0.79 |
|                                              | FCSI-MM     | -9.69               | 43.48  | 10.49           | 31.84  | 28.00 | -1.06 | 0.29 |
|                                              | FCAI-R      | 15.18               | 41.13  | 33.42           | 45.60  | 31.00 | -0.79 | 0.43 |

|                                                |              |          |        |         |        |       |       |      |
|------------------------------------------------|--------------|----------|--------|---------|--------|-------|-------|------|
| Clenching<br>on<br>Dental<br>Cotton<br>Rollers | FCAI-L       | 31.13    | 51.14  | 39.47   | 33.91  | 40.00 | 0.00  | 1.00 |
|                                                | FCAI-tot     | 25.93    | 43.97  | 38.81   | 35.48  | 32.00 | -0.71 | 0.48 |
|                                                | POC          | 109.84   | 22.45  | 106.75  | 22.74  | 31.00 | 0.79  | 0.43 |
|                                                | TC           | -1921.48 | 11549. | -       | 6235.5 | 39.00 | 0.09  | 0.93 |
|                                                |              |          | 16     | 4318.59 | 2      |       |       |      |
|                                                | SCM-R        | 11.73    | 7.92   | 18.98   | 12.58  | 27.00 | -1.15 | 0.25 |
|                                                | SCM-L        | 12.61    | 12.66  | 27.54   | 24.85  | 18.00 | -1.94 | 0.05 |
|                                                | SCM-tot      | 12.17    | 10.00  | 23.26   | 16.55  | 20.00 | -1.77 | 0.08 |
|                                                | ASI-SCM      | 1.25     | 15.73  | -13.89  | 22.08  | 24.00 | 1.41  | 0.16 |
|                                                | FCI-SCM-R    | 3.46     | 2.38   | 8.32    | 7.47   | 20.00 | -1.77 | 0.08 |
|                                                | FCI-SCM-L    | 4.79     | 6.18   | 11.07   | 12.23  | 18.00 | -1.94 | 0.06 |
|                                                | FCI-SCM- tot | 3.93     | 3.94   | 8.44    | 6.20   | 20.00 | -1.77 | 0.08 |
|                                                | FCSI-SCM     | -2.39    | 27.06  | -7.45   | 33.26  | 39.00 | -0.09 | 0.93 |
|                                                | UT-R         | 7.67     | 5.95   | 6.32    | 5.04   | 34.00 | 0.53  | 0.60 |
|                                                | UT-L         | 9.97     | 9.39   | 4.60    | 1.23   | 23.00 | 1.50  | 0.13 |
|                                                | UT-tot       | 8.82     | 6.32   | 5.46    | 2.54   | 29.00 | 0.97  | 0.33 |
|                                                | ASI-UT       | -12.79   | 32.67  | 2.05    | 41.52  | 37.00 | -0.26 | 0.79 |
|                                                | FCI-UT-R     | 1.29     | 1.14   | 1.16    | 0.38   | 33.00 | -0.62 | 0.54 |
|                                                | FCI-UT-L     | 1.51     | 1.22   | 1.31    | 0.56   | 35.00 | -0.05 | 0.96 |
|                                                | FCI-UT-tot   | 1.10     | 0.34   | 1.23    | 0.42   | 39.00 | -0.09 | 0.93 |
|                                                | FCSI-UT      | 7.88     | 48.49  | -5.25   | 16.88  | 31.00 | 0.79  | 0.43 |
|                                                | TA-R         | 179.70   | 46.86  | 140.31  | 56.45  | 22.00 | 1.59  | 0.11 |
|                                                | TA-L         | 171.31   | 65.77  | 140.89  | 44.62  | 28.00 | 1.06  | 0.29 |
|                                                | TA-tot       | 175.51   | 46.69  | 140.60  | 36.67  | 23.00 | 1.50  | 0.13 |
|                                                | AsI -TA      | 4.14     | 19.12  | -1.82   | 23.31  | 33.00 | 0.62  | 0.54 |
|                                                | FCI-TA-R     | 39.60    | 18.38  | 40.29   | 32.37  | 36.00 | 0.35  | 0.72 |
|                                                | FCI-TA-L     | 32.24    | 23.91  | 25.99   | 17.14  | 35.00 | 0.44  | 0.66 |
|                                                | FCI-TA -tot  | 33.06    | 19.44  | 29.04   | 19.04  | 37.00 | 0.26  | 0.79 |
|                                                | FCSI-TA      | 18.46    | 31.00  | 10.76   | 35.17  | 34.00 | 0.53  | 0.60 |
|                                                | MM-R         | 243.19   | 119.93 | 273.97  | 116.03 | 28.00 | -1.06 | 0.29 |
|                                                | MM-L         | 218.81   | 78.91  | 258.29  | 109.04 | 31.00 | -0.79 | 0.43 |
|                                                | MM-tot       | 231.00   | 96.87  | 266.13  | 104.66 | 30.00 | -0.88 | 0.38 |
|                                                | AsI -MM      | 2.81     | 14.60  | 0.71    | 19.03  | 34.00 | 0.53  | 0.60 |
|                                                | AcI-R        | 10.92    | 22.73  | 28.42   | 28.68  | 23.00 | -1.50 | 0.13 |
|                                                | AcI-L        | 12.50    | 17.86  | 26.90   | 17.66  | 27.00 | -1.15 | 0.25 |
|                                                | AcI- tot     | 11.41    | 15.30  | 27.63   | 19.49  | 19.00 | -1.85 | 0.06 |
|                                                | FCI-MM-R     | 88.98    | 73.72  | 107.09  | 74.80  | 34.00 | -0.53 | 0.60 |
|                                                | FCI-MM-L     | 3291.50  | 9653.3 | 85.99   | 50.31  | 40.00 | 0.00  | 1.00 |
|                                                |              |          | 2      |         |        |       |       |      |
|                                                | FCI-MM-tot   | 90.11    | 68.10  | 92.54   | 59.53  | 37.00 | -0.26 | 0.79 |
|                                                | FCSI-MM      | -6.97    | 40.75  | 7.46    | 33.44  | 33.00 | -0.62 | 0.54 |
|                                                | FCAI-R       | 26.93    | 35.05  | 40.69   | 37.12  | 30.00 | -0.88 | 0.38 |
|                                                | FCAI-L       | 42.12    | 46.69  | 47.49   | 37.30  | 39.00 | -0.09 | 0.93 |
|                                                | FCAI-tot     | 37.60    | 38.42  | 46.81   | 30.18  | 37.00 | -0.26 | 0.79 |
|                                                | POC          | 110.09   | 23.08  | 106.72  | 36.07  | 31.00 | 0.79  | 0.43 |
|                                                | TC           | -1597.41 | 9833.2 | -       | 8668.2 | 37.00 | -0.26 | 0.79 |
|                                                |              |          | 0      | 1625.56 | 0      |       |       |      |
|                                                | SCM-R        | 32.64    | 51.80  | 17.98   | 10.95  | 38.00 | 0.18  | 0.86 |
|                                                | SCM-L        | 15.47    | 9.79   | 18.26   | 13.04  | 34.00 | -0.53 | 0.60 |

|                    |        |        |        |        |       |       |       |
|--------------------|--------|--------|--------|--------|-------|-------|-------|
| SCM-tot            | 24.05  | 26.47  | 18.12  | 11.54  | 38.00 | 0.18  | 0.86  |
| AsI -SCM           | 11.56  | 33.94  | -0.44  | 19.87  | 33.00 | 0.62  | 0.54  |
| FCI-SCM-R          | 9.50   | 14.41  | 8.44   | 8.76   | 40.00 | 0.00  | 1.00  |
| FCI-SCM-L          | 5.45   | 4.93   | 6.66   | 5.30   | 33.00 | -0.62 | 0.54  |
| FCI-SCM- tot       | 7.39   | 8.12   | 7.14   | 6.49   | 38.00 | -0.18 | 0.86  |
| FCSI-SCM           | 8.08   | 41.04  | 2.83   | 25.05  | 39.00 | -0.09 | 0.93  |
| UT-R               | 10.27  | 7.09   | 10.76  | 6.72   | 36.00 | -0.35 | 0.72  |
| UT-L               | 7.25   | 2.91   | 7.18   | 4.42   | 34.00 | 0.53  | 0.60  |
| UT-tot             | 8.76   | 4.38   | 8.97   | 4.85   | 37.00 | 0.26  | 0.79  |
| AsI -UT            | 10.48  | 25.49  | 15.08  | 38.46  | 36.00 | -0.35 | 0.72  |
| FCI-UT-R           | 2.06   | 1.93   | 2.77   | 2.70   | 34.00 | -0.53 | 0.60  |
| FCI-UT-L           | 1.44   | 1.11   | 1.78   | 0.78   | 28.00 | -1.06 | 0.29  |
| FCI-UT-tot         | 1.25   | 0.66   | 1.88   | 1.21   | 26.00 | -1.24 | 0.22  |
| FCSI-UT            | 15.30  | 40.19  | 8.38   | 28.21  | 32.00 | 0.71  | 0.48  |
| <b>MVC-TA-R</b>    | 99.03  | 38.02  | 110.88 | 43.36  | 35.00 | -0.44 | 0.66  |
| <b>MVC-TA-L</b>    | 98.33  | 32.12  | 113.01 | 49.11  | 30.00 | -0.88 | 0.38  |
| <b>MVC-TA-tot</b>  | 97.81  | 34.47  | 109.56 | 44.45  | 31.00 | -0.79 | 0.43  |
| <b>MVC-MM-R</b>    | 87.21  | 52.65  | 103.40 | 61.85  | 37.00 | -0.26 | 0.79  |
| <b>MVC-MM-L</b>    | 82.97  | 48.53  | 97.78  | 57.83  | 32.00 | -0.71 | 0.48  |
| <b>MVC-MM-tot</b>  | 84.76  | 49.10  | 99.95  | 59.68  | 33.00 | -0.62 | 0.54  |
| <b>MVC-SCM-R</b>   | 66.41  | 36.01  | 107.88 | 47.35  | 20.00 | -1.77 | 0.08  |
| <b>MVC-SCM-L</b>   | 74.78  | 26.69  | 217.74 | 307.82 | 22.00 | -1.59 | 0.11  |
| <b>MVC-SCM-tot</b> | 65.07  | 31.85  | 145.51 | 119.07 | 17.00 | -2.03 | 0.04* |
| <b>MVC-UT-R</b>    | 77.76  | 32.93  | 70.34  | 47.94  | 32.00 | 0.71  | 0.48  |
| <b>MVC-UT-L</b>    | 151.93 | 168.84 | 90.29  | 66.86  | 27.00 | 1.15  | 0.25  |
| <b>MVC-UT-tot</b>  | 107.84 | 80.67  | 77.83  | 57.72  | 26.00 | 1.24  | 0.22  |

AcI— activity index; AEO— abdominal external oblique muscle; AsI— asymmetry index; BB — biceps brachii muscle; ES—effect size; FCAI— Functional Clenching Activity Index; FCI — Functional Clenching Index; FCoI— Functional Contraction Index; FCoSI— Functional Contraction Symmetry Index; FCSI— Functional Clenching Symmetry Index; L— left side; MM — the superficial part of the masseter muscle; MVC— maximum voluntary contraction; n— individuals in the sample; POC— percentage overlapping coefficient; R— right side; RA-lo — the lower part of the rectus abdominis muscle; RA-up— the upper part of the rectus abdominis muscle; SCM — the middle part of the sternocleidomastoid muscle; SD — standard deviation; TA — the anterior part of the temporalis muscle; TC— torque coefficient; U— the difference between the two rank totals; UT— the upper part of the trapezius muscle; Z— the Mann-Whitney U test; \* significant difference.

**Table S3.** Comparison of bioelectrical activity findings of masticatory and cervical spine muscles in emmetropic subjects and myopic subjects (Accommodation Paralysis in The Right Eye).

|                                                              |             | Emmetropic Subjects |        | Myopic Subjects |         | U     | Z     | P     |
|--------------------------------------------------------------|-------------|---------------------|--------|-----------------|---------|-------|-------|-------|
|                                                              |             | Mean                | SD     | Mean            | SD      |       |       |       |
| <b>Rest</b>                                                  | TA-R        | 4.94                | 1.79   | 7.31            | 5.91    | 37.00 | -0.26 | 0.79  |
|                                                              | TA-L        | 7.10                | 3.48   | 7.02            | 4.50    | 36.00 | 0.35  | 0.72  |
|                                                              | TA-tot      | 6.02                | 1.73   | 7.17            | 5.06    | 37.00 | 0.26  | 0.79  |
|                                                              | AsI -TA     | -14.30              | 28.76  | -5.23           | 24.10   | 34.00 | -0.53 | 0.60  |
|                                                              | MM-R        | 3.91                | 3.49   | 3.37            | 1.63    | 40.00 | 0.00  | 1.00  |
|                                                              | MM-L        | 4.73                | 4.01   | 6.31            | 9.96    | 34.00 | 0.53  | 0.60  |
|                                                              | MM-tot      | 4.32                | 3.73   | 4.84            | 5.52    | 37.00 | -0.26 | 0.79  |
|                                                              | AsI -MM     | -10.41              | 13.24  | -9.00           | 33.79   | 36.00 | -0.35 | 0.72  |
|                                                              | AcI-R       | -18.12              | 33.52  | -24.37          | 35.68   | 34.00 | 0.53  | 0.60  |
|                                                              | AcI-L       | -22.12              | 33.63  | -20.27          | 39.08   | 40.00 | 0.00  | 1.00  |
|                                                              | AcI-tot     | -22.52              | 31.79  | -20.82          | 30.51   | 36.00 | -0.35 | 0.72  |
|                                                              | POC         | 82.55               | 33.96  | 88.89           | 27.59   | 34.00 | -0.53 | 0.60  |
|                                                              | TC          | -134.22             | 449.11 | 323.44          | 1133.55 | 32.00 | -0.71 | 0.48  |
|                                                              | SCM-R       | 3.47                | 1.52   | 4.24            | 3.81    | 40.00 | 0.00  | 1.00  |
|                                                              | SCM-L       | 4.22                | 3.37   | 3.05            | 1.04    | 37.00 | 0.26  | 0.79  |
|                                                              | SCM-tot     | 3.84                | 1.93   | 3.64            | 1.95    | 38.00 | 0.18  | 0.86  |
|                                                              | AsI -SCM    | -3.86               | 25.84  | 6.70            | 26.14   | 37.00 | -0.26 | 0.79  |
|                                                              | UT-R        | 5.39                | 5.17   | 6.64            | 6.64    | 38.00 | -0.18 | 0.86  |
|                                                              | UT-L        | 5.40                | 3.47   | 4.88            | 3.07    | 40.00 | 0.00  | 1.00  |
|                                                              | UT-tot      | 5.39                | 3.85   | 5.76            | 3.77    | 38.00 | -0.18 | 0.86  |
|                                                              | AsI -UT     | -6.07               | 32.02  | 1.46            | 43.23   | 37.00 | -0.26 | 0.79  |
| <b>Clenching<br/>in<br/>The<br/>Intercuspal<br/>Position</b> | TA-R        | 168.65              | 79.71  | 145.50          | 45.88   | 34.00 | 0.53  | 0.60  |
|                                                              | TA-L        | 161.52              | 86.57  | 130.69          | 69.60   | 37.00 | 0.26  | 0.79  |
|                                                              | TA-tot      | 165.09              | 75.66  | 138.09          | 44.35   | 30.00 | 0.88  | 0.38  |
|                                                              | AsI -TA     | 1.72                | 18.56  | 8.73            | 36.70   | 38.00 | -0.18 | 0.86  |
|                                                              | FCI-TA-R    | 37.08               | 19.83  | 38.88           | 30.06   | 38.00 | 0.18  | 0.86  |
|                                                              | FCI-TA-L    | 29.22               | 29.05  | 26.68           | 21.59   | 38.00 | 0.18  | 0.86  |
|                                                              | FCI-TA -tot | 30.39               | 22.62  | 30.23           | 20.49   | 40.00 | 0.00  | 1.00  |
|                                                              | FCSI-TA     | 15.03               | 31.78  | 12.57           | 41.76   | 35.00 | 0.44  | 0.66  |
|                                                              | MM-R        | 225.16              | 179.85 | 302.33          | 204.12  | 32.00 | -0.71 | 0.48  |
|                                                              | MM-L        | 186.74              | 124.11 | 284.64          | 208.67  | 31.00 | -0.79 | 0.43  |
|                                                              | MM-tot      | 205.95              | 148.79 | 293.48          | 205.02  | 32.00 | -0.71 | 0.48  |
|                                                              | AsI -MM     | 4.30                | 15.90  | 2.65            | 11.26   | 37.00 | 0.26  | 0.79  |
|                                                              | AcI-R       | 0.94                | 29.39  | 23.55           | 31.70   | 24.00 | -1.41 | 0.16  |
|                                                              | AcI-L       | -1.19               | 26.52  | 29.34           | 37.79   | 18.00 | -1.94 | 0.05  |
|                                                              | AcI- tot    | -0.26               | 24.99  | 24.57           | 29.37   | 16.00 | -2.12 | 0.03* |
|                                                              | FCI-MM-R    | 89.59               | 88.90  | 126.61          | 122.52  | 32.00 | -0.71 | 0.48  |
|                                                              | FCI-MM-L    | 55.94               | 41.27  | 87.44           | 79.95   | 31.00 | -0.79 | 0.43  |
|                                                              | FCI-MM-tot  | 67.52               | 53.07  | 97.55           | 88.19   | 33.00 | -0.62 | 0.54  |
|                                                              | FCSI-MM     | 14.14               | 24.72  | 11.84           | 35.92   | 40.00 | 0.00  | 1.00  |
|                                                              | FCAI-R      | 17.50               | 43.76  | 40.32           | 40.75   | 28.00 | -1.06 | 0.29  |
|                                                              | FCAI-L      | 18.58               | 46.78  | 45.49           | 34.74   | 27.00 | -1.15 | 0.25  |

|                                                           |              |          |          |         |         |       |       |      |
|-----------------------------------------------------------|--------------|----------|----------|---------|---------|-------|-------|------|
| <b>Clenching<br/>on<br/>Dental<br/>Cotton<br/>Rollers</b> | FCAI-tot     | 20.62    | 43.40    | 41.74   | 28.82   | 30.00 | -0.88 | 0.38 |
|                                                           | POC          | 109.61   | 23.44    | 116.49  | 44.67   | 31.00 | 0.79  | 0.43 |
|                                                           | TC           | -3128.33 | 11170.30 | -288.00 | 8012.85 | 28.00 | -1.06 | 0.29 |
|                                                           | SCM-R        | 13.03    | 12.47    | 37.80   | 57.72   | 21.00 | -1.68 | 0.09 |
|                                                           | SCM-L        | 16.09    | 18.54    | 19.96   | 9.49    | 23.50 | -1.46 | 0.15 |
|                                                           | SCM-tot      | 14.56    | 15.37    | 28.88   | 29.41   | 19.00 | -1.85 | 0.06 |
|                                                           | AsI -SCM     | -5.36    | 19.20    | 6.14    | 34.81   | 27.00 | -1.15 | 0.25 |
|                                                           | FCI-SCM-R    | 4.00     | 4.13     | 14.14   | 23.72   | 26.00 | -1.24 | 0.22 |
|                                                           | FCI-SCM-L    | 5.12     | 6.86     | 7.44    | 5.20    | 23.00 | -1.50 | 0.13 |
|                                                           | FCI-SCM- tot | 4.50     | 5.46     | 10.14   | 11.58   | 21.00 | -1.68 | 0.09 |
|                                                           | FCSI-SCM     | -0.76    | 19.04    | -1.84   | 42.26   | 39.00 | 0.09  | 0.93 |
|                                                           | UT-R         | 10.28    | 9.54     | 8.72    | 7.70    | 34.00 | 0.53  | 0.60 |
|                                                           | UT-L         | 6.35     | 3.73     | 6.75    | 3.39    | 40.00 | 0.00  | 1.00 |
|                                                           | UT-tot       | 8.31     | 6.05     | 7.73    | 5.23    | 39.00 | 0.09  | 0.93 |
|                                                           | ASI-UT       | 8.65     | 27.71    | -2.53   | 33.79   | 30.00 | 0.88  | 0.38 |
|                                                           | FCI-UT-R     | 2.54     | 2.71     | 1.34    | 0.38    | 39.00 | -0.09 | 0.93 |
|                                                           | FCI-UT-L     | 1.30     | 0.64     | 1.57    | 0.91    | 24.00 | -1.41 | 0.16 |
|                                                           | FCI-UT-tot   | 1.73     | 1.49     | 1.34    | 0.39    | 40.00 | 0.00  | 1.00 |
|                                                           | FCSI-UT      | 15.65    | 25.52    | -3.89   | 22.41   | 22.00 | 1.59  | 0.11 |
|                                                           | TA-R         | 190.23   | 70.03    | 162.56  | 65.42   | 31.00 | 0.79  | 0.43 |
|                                                           | TA-L         | 179.31   | 91.68    | 153.40  | 43.72   | 34.00 | 0.53  | 0.60 |
|                                                           | TA-tot       | 184.77   | 75.82    | 157.98  | 44.34   | 31.00 | 0.79  | 0.43 |
|                                                           | AsI -TA      | 5.76     | 17.90    | 0.64    | 19.91   | 36.00 | 0.35  | 0.72 |
|                                                           | FCI-TA-R     | 41.80    | 17.23    | 43.93   | 39.66   | 34.00 | 0.53  | 0.60 |
|                                                           | FCI-TA-L     | 33.50    | 29.23    | 30.98   | 19.97   | 39.00 | -0.09 | 0.93 |
|                                                           | FCI-TA -tot  | 34.94    | 22.02    | 35.04   | 26.24   | 37.00 | 0.26  | 0.79 |
|                                                           | FCSI-TA      | 19.08    | 30.49    | 5.79    | 27.10   | 28.00 | 1.06  | 0.29 |
|                                                           | MM-R         | 290.44   | 185.96   | 307.34  | 140.65  | 35.00 | -0.44 | 0.66 |
|                                                           | MM-L         | 257.19   | 138.20   | 290.20  | 147.52  | 35.00 | -0.44 | 0.66 |
|                                                           | MM-tot       | 273.81   | 157.72   | 298.77  | 138.10  | 36.00 | -0.35 | 0.72 |
|                                                           | AsI -MM      | 3.86     | 17.75    | 1.60    | 18.06   | 35.00 | 0.44  | 0.66 |
|                                                           | AcI-R        | 14.28    | 25.11    | 26.64   | 26.74   | 29.00 | -0.97 | 0.33 |
|                                                           | AcI-L        | 16.40    | 21.49    | 26.24   | 17.83   | 31.00 | -0.79 | 0.43 |
|                                                           | AcI- tot     | 15.39    | 19.82    | 26.44   | 20.38   | 26.00 | -1.24 | 0.22 |
|                                                           | FCI-MM-R     | 109.62   | 89.82    | 114.68  | 76.12   | 37.00 | -0.26 | 0.79 |
|                                                           | FCI-MM-L     | 71.59    | 40.86    | 92.48   | 60.61   | 32.00 | -0.71 | 0.48 |
|                                                           | FCI-MM-tot   | 85.54    | 55.99    | 93.49   | 53.29   | 38.00 | -0.18 | 0.86 |
|                                                           | FCSI-MM      | 13.89    | 24.92    | 9.69    | 41.43   | 35.00 | 0.44  | 0.66 |
|                                                           | FCAI-R       | 28.44    | 39.23    | 44.23   | 34.20   | 29.00 | -0.97 | 0.33 |
|                                                           | FCAI-L       | 32.79    | 37.97    | 43.61   | 34.87   | 34.00 | -0.53 | 0.60 |
|                                                           | FCAI-tot     | 33.53    | 34.89    | 44.00   | 25.73   | 36.00 | -0.35 | 0.72 |
|                                                           | POC          | 113.99   | 28.40    | 109.78  | 39.49   | 32.00 | 0.71  | 0.48 |
|                                                           | TC           | -2233.70 | 11314.51 | -797.78 | 6085.07 | 34.00 | -0.53 | 0.60 |
|                                                           | SCM-R        | 17.52    | 11.15    | 19.18   | 7.45    | 34.00 | -0.53 | 0.60 |
|                                                           | SCM-L        | 21.47    | 20.50    | 19.30   | 11.26   | 36.00 | -0.35 | 0.72 |
|                                                           | SCM-tot      | 19.49    | 15.13    | 19.24   | 8.70    | 36.00 | -0.35 | 0.72 |
|                                                           | AsI -SCM     | -3.44    | 20.47    | 2.26    | 20.94   | 38.00 | -0.18 | 0.86 |
|                                                           | FCI-SCM-R    | 5.21     | 3.31     | 6.23    | 3.77    | 35.00 | -0.44 | 0.66 |

|                    |       |       |        |        |       |       |      |
|--------------------|-------|-------|--------|--------|-------|-------|------|
| FCI-SCM-L          | 6.84  | 7.60  | 6.59   | 3.18   | 32.00 | -0.71 | 0.48 |
| FCI-SCM- tot       | 5.92  | 5.46  | 6.13   | 3.30   | 35.00 | -0.44 | 0.66 |
| FCSI-SCM           | 0.10  | 26.70 | -5.20  | 32.09  | 39.00 | 0.09  | 0.93 |
| UT-R               | 9.97  | 8.36  | 11.09  | 7.70   | 33.00 | -0.62 | 0.54 |
| UT-L               | 7.41  | 4.18  | 7.79   | 5.40   | 40.00 | 0.00  | 1.00 |
| UT-tot             | 8.69  | 5.66  | 9.44   | 5.77   | 38.00 | -0.18 | 0.86 |
| AsI-UT             | 3.36  | 24.10 | 11.20  | 37.39  | 36.00 | -0.35 | 0.72 |
| FCI-UT-R           | 2.75  | 3.15  | 2.67   | 2.62   | 40.00 | 0.00  | 1.00 |
| FCI-UT-L           | 1.51  | 0.64  | 1.73   | 1.13   | 39.00 | 0.09  | 0.93 |
| FCI-UT-tot         | 1.14  | 0.34  | 1.45   | 0.80   | 33.00 | -0.62 | 0.54 |
| FCSI-UT            | 9.88  | 28.59 | 5.72   | 42.58  | 29.00 | 0.97  | 0.33 |
| <b>MVC-TA-R</b>    | 89.93 | 38.46 | 98.53  | 42.11  | 36.00 | -0.35 | 0.72 |
| <b>MVC-TA-L</b>    | 94.72 | 33.43 | 92.29  | 53.20  | 38.00 | 0.18  | 0.86 |
| <b>MVC-TA-tot</b>  | 91.91 | 35.62 | 94.08  | 44.38  | 38.00 | 0.18  | 0.86 |
| <b>MVC-MM-R</b>    | 72.15 | 37.63 | 95.90  | 54.80  | 33.00 | -0.62 | 0.54 |
| <b>MVC-MM-L</b>    | 70.94 | 34.79 | 97.02  | 57.15  | 25.00 | -1.32 | 0.19 |
| <b>MVC-MM-tot</b>  | 71.02 | 34.99 | 95.27  | 55.20  | 30.00 | -0.88 | 0.38 |
| <b>MVC-SCM-R</b>   | 67.72 | 22.09 | 174.99 | 228.12 | 18.00 | -1.94 | 0.06 |
| <b>MVC-SCM-L</b>   | 72.34 | 28.23 | 122.75 | 77.23  | 28.00 | -1.06 | 0.29 |
| <b>MVC-SCM-tot</b> | 68.92 | 22.22 | 147.60 | 122.04 | 19.00 | -1.85 | 0.06 |
| <b>MVC-UT-R</b>    | 99.89 | 33.11 | 92.62  | 65.06  | 33.00 | 0.62  | 0.54 |
| <b>MVC-UT-L</b>    | 87.12 | 20.03 | 116.61 | 85.15  | 34.00 | -0.53 | 0.60 |
| <b>MVC-UT-tot</b>  | 94.00 | 23.70 | 95.15  | 58.48  | 33.00 | 0.62  | 0.54 |

AcI— activity index; AEO— abdominal external oblique muscle; AsI— asymmetry index; BB — biceps brachii muscle; ES—effect size; FCAI— Functional Clenching Activity Index; FCI — Functional Clenching Index; FCoI— Functional Contraction Index; FCoSI— Functional Contraction Symmetry Index; FCSI— Functional Clenching Symmetry Index; L— left side; MM — the superficial part of the masseter muscle; MVC— maximum voluntary contraction; n— individuals in the sample; POC— percentage overlapping coefficient; R— right side; RA-lo — the lower part of the rectus abdominis muscle; RA-up— the upper part of the rectus abdominis muscle; SCM — the middle part of the sternocleidomastoid muscle; SD — standard deviation; TA — the anterior part of the temporalis muscle; TC— torque coefficient; U— the difference between the two rank totals; UT— the upper part of the trapezius muscle; Z— the Mann-Whitney U test; \* significant difference.



**Table S4.** Comparison of bioelectrical activity findings of masticatory and cervical spine muscles in emmetropic subjects and myopic subjects (Accommodation Paralysis in The Left Eye).

|                                                              |             | Emmetropic Subjects |        | Myopic Subjects |         | U     | Z     | P     |
|--------------------------------------------------------------|-------------|---------------------|--------|-----------------|---------|-------|-------|-------|
|                                                              |             | Mean                | SD     | Mean            | SD      |       |       |       |
| <b>Rest</b>                                                  | TA-R        | 4.99                | 2.46   | 7.03            | 5.35    | 35.50 | -0.40 | 0.69  |
|                                                              | TA-L        | 6.47                | 3.47   | 7.11            | 3.60    | 34.00 | -0.53 | 0.60  |
|                                                              | TA-tot      | 5.73                | 2.24   | 7.07            | 4.16    | 36.00 | -0.35 | 0.72  |
|                                                              | AsI -TA     | -9.34               | 30.08  | -7.22           | 25.10   | 40.00 | 0.00  | 1.00  |
|                                                              | MM-R        | 4.00                | 2.49   | 3.21            | 2.05    | 34.50 | 0.49  | 0.63  |
|                                                              | MM-L        | 3.99                | 2.45   | 6.39            | 11.12   | 31.00 | 0.79  | 0.43  |
|                                                              | MM-tot      | 4.00                | 2.28   | 4.80            | 6.44    | 28.00 | 1.06  | 0.29  |
|                                                              | AsI -MM     | -1.86               | 24.63  | -10.60          | 27.35   | 34.00 | 0.53  | 0.60  |
|                                                              | AcI-R       | -13.11              | 28.54  | -29.20          | 35.68   | 27.00 | 1.15  | 0.25  |
|                                                              | AcI-L       | -20.94              | 32.47  | -26.99          | 39.13   | 35.00 | 0.44  | 0.66  |
|                                                              | AcI-tot     | -18.65              | 25.53  | -27.00          | 35.37   | 31.00 | 0.79  | 0.43  |
|                                                              | POC         | 94.08               | 37.71  | 89.24           | 38.89   | 36.00 | 0.35  | 0.72  |
|                                                              | TC          | -149.89             | 433.21 | 310.22          | 1198.30 | 32.00 | -0.71 | 0.48  |
|                                                              | SCM-R       | 4.00                | 1.75   | 4.45            | 6.60    | 20.00 | 1.77  | 0.08  |
|                                                              | SCM-L       | 3.29                | 0.80   | 2.66            | 0.63    | 20.00 | 1.77  | 0.08  |
|                                                              | SCM-tot     | 3.64                | 1.18   | 3.56            | 3.27    | 18.00 | 1.94  | 0.05  |
|                                                              | AsI -SCM    | 6.82                | 16.34  | 1.65            | 33.94   | 29.00 | 0.97  | 0.33  |
|                                                              | UT-R        | 6.80                | 5.99   | 8.36            | 6.94    | 32.00 | -0.71 | 0.48  |
|                                                              | UT-L        | 28.01               | 64.22  | 5.25            | 2.94    | 30.00 | 0.88  | 0.38  |
|                                                              | UT-tot      | 17.40               | 31.35  | 6.81            | 4.63    | 34.00 | 0.53  | 0.60  |
|                                                              | AsI -UT     | -13.03              | 39.65  | 10.71           | 36.98   | 28.00 | -1.06 | 0.29  |
| <b>Clenching<br/>in<br/>The<br/>Intercuspal<br/>Position</b> | TA-R        | 188.30              | 82.96  | 155.70          | 53.57   | 33.00 | 0.62  | 0.54  |
|                                                              | TA-L        | 186.69              | 88.70  | 158.86          | 59.84   | 37.50 | 0.22  | 0.83  |
|                                                              | TA-tot      | 187.49              | 76.59  | 157.28          | 47.54   | 32.00 | 0.71  | 0.48  |
|                                                              | AsI -TA     | 1.08                | 19.78  | -1.25           | 18.92   | 39.00 | 0.09  | 0.93  |
|                                                              | FCI-TA-R    | 50.20               | 36.00  | 36.78           | 23.77   | 33.00 | 0.62  | 0.54  |
|                                                              | FCI-TA-L    | 46.40               | 47.36  | 29.89           | 21.32   | 36.00 | 0.35  | 0.72  |
|                                                              | FCI-TA -tot | 44.35               | 39.29  | 31.77           | 20.78   | 35.00 | 0.44  | 0.66  |
|                                                              | FCSI-TA     | 9.77                | 36.01  | 5.63            | 27.37   | 39.00 | 0.09  | 0.93  |
|                                                              | MM-R        | 236.27              | 187.08 | 326.11          | 239.26  | 30.00 | -0.88 | 0.38  |
|                                                              | MM-L        | 199.55              | 130.05 | 276.94          | 221.89  | 33.00 | -0.62 | 0.54  |
|                                                              | MM-tot      | 217.91              | 155.30 | 301.53          | 228.79  | 33.00 | -0.62 | 0.54  |
|                                                              | AsI -MM     | 3.69                | 15.61  | 7.92            | 13.71   | 33.00 | -0.62 | 0.54  |
|                                                              | AcI-R       | -2.13               | 31.27  | 23.28           | 32.19   | 22.00 | -1.59 | 0.11  |
|                                                              | AcI-L       | -4.04               | 31.03  | 14.09           | 30.48   | 27.00 | -1.15 | 0.25  |
|                                                              | AcI- tot    | -3.42               | 27.85  | 18.69           | 29.89   | 25.00 | -1.32 | 0.19  |
|                                                              | FCI-MM-R    | 92.22               | 94.61  | 146.85          | 144.60  | 32.00 | -0.71 | 0.48  |
|                                                              | FCI-MM-L    | 59.47               | 43.28  | 109.72          | 119.72  | 32.00 | -0.71 | 0.48  |
|                                                              | FCI-MM-tot  | 70.85               | 60.97  | 123.98          | 132.11  | 33.00 | -0.62 | 0.54  |
|                                                              | FCSI-MM     | 5.57                | 33.02  | 16.91           | 33.05   | 34.00 | -0.53 | 0.60  |
|                                                              | FCAI-R      | 10.90               | 33.53  | 44.88           | 38.82   | 16.00 | -2.12 | 0.03* |
|                                                              | FCAI-L      | 14.21               | 38.64  | 37.77           | 38.68   | 26.00 | -1.24 | 0.22  |

|                                                           |              |          |          |          |         |       |       |       |
|-----------------------------------------------------------|--------------|----------|----------|----------|---------|-------|-------|-------|
| <b>Clenching<br/>on<br/>Dental<br/>Cotton<br/>Rollers</b> | FCAI-tot     | 13.94    | 30.84    | 40.87    | 34.05   | 21.00 | -1.68 | 0.09  |
|                                                           | POC          | 106.91   | 21.51    | 112.58   | 28.64   | 38.00 | 0.18  | 0.86  |
|                                                           | TC           | -3510.74 | 12302.01 | -5234.44 | 7683.73 | 39.00 | -0.09 | 0.93  |
|                                                           | SCM-R        | 14.78    | 12.90    | 59.02    | 107.21  | 22.00 | -1.59 | 0.11  |
|                                                           | SCM-L        | 16.70    | 19.16    | 28.06    | 17.40   | 21.00 | -1.68 | 0.09  |
|                                                           | SCM-tot      | 15.74    | 15.73    | 43.54    | 58.20   | 19.00 | -1.85 | 0.06  |
|                                                           | AsI -SCM     | -1.02    | 17.53    | 3.61     | 33.82   | 39.00 | 0.09  | 0.93  |
|                                                           | FCI-SCM-R    | 3.87     | 3.66     | 21.53    | 35.31   | 18.00 | -1.94 | 0.05  |
|                                                           | FCI-SCM-L    | 4.82     | 5.12     | 11.09    | 7.25    | 15.00 | -2.21 | 0.03* |
|                                                           | FCI-SCM- tot | 4.32     | 4.43     | 16.26    | 21.16   | 19.00 | -1.85 | 0.06  |
|                                                           | FCSI-SCM     | -7.72    | 13.78    | 1.40     | 41.22   | 32.00 | -0.71 | 0.48  |
|                                                           | UT-R         | 8.58     | 7.08     | 7.84     | 5.04    | 40.00 | 0.00  | 1.00  |
|                                                           | UT-L         | 7.26     | 4.23     | 6.01     | 2.73    | 34.00 | 0.53  | 0.60  |
|                                                           | UT-tot       | 7.92     | 5.14     | 6.93     | 2.65    | 38.00 | 0.18  | 0.86  |
|                                                           | AsI -UT      | 1.79     | 32.24    | 4.23     | 41.35   | 40.00 | 0.00  | 1.00  |
|                                                           | FCI-UT-R     | 1.42     | 0.54     | 1.09     | 0.36    | 30.00 | 0.88  | 0.38  |
|                                                           | FCI-UT-L     | 1.19     | 0.69     | 1.29     | 0.47    | 36.00 | -0.35 | 0.72  |
|                                                           | FCI-UT-tot   | 1.17     | 0.53     | 1.18     | 0.36    | 39.00 | 0.09  | 0.93  |
|                                                           | FCSI-UT      | 10.39    | 38.79    | -7.20    | 16.80   | 26.00 | 1.24  | 0.22  |
|                                                           | TA-R         | 206.81   | 62.67    | 171.46   | 65.71   | 30.00 | 0.88  | 0.38  |
|                                                           | TA-L         | 190.63   | 72.09    | 160.15   | 47.38   | 33.00 | 0.62  | 0.54  |
|                                                           | TA-tot       | 198.72   | 59.45    | 165.80   | 41.62   | 33.00 | 0.62  | 0.54  |
|                                                           | AsI -TA      | 5.34     | 17.42    | 1.43     | 21.76   | 35.00 | 0.44  | 0.66  |
|                                                           | FCI-TA-R     | 51.39    | 29.41    | 41.01    | 32.14   | 31.00 | 0.79  | 0.43  |
|                                                           | FCI-TA-L     | 47.72    | 46.43    | 28.44    | 15.65   | 35.00 | 0.44  | 0.66  |
|                                                           | FCI-TA -tot  | 46.62    | 37.29    | 32.41    | 19.81   | 33.00 | 0.62  | 0.54  |
|                                                           | FCSI-TA      | 13.90    | 29.69    | 7.73     | 29.97   | 40.00 | 0.00  | 1.00  |
|                                                           | MM-R         | 304.64   | 159.72   | 309.06   | 150.30  | 39.00 | -0.09 | 0.93  |
|                                                           | MM-L         | 258.93   | 117.29   | 287.96   | 148.07  | 37.00 | -0.26 | 0.79  |
|                                                           | MM-tot       | 281.79   | 133.57   | 298.51   | 143.68  | 37.00 | -0.26 | 0.79  |
|                                                           | AsI -MM      | 5.65     | 17.31    | 1.93     | 18.00   | 32.00 | 0.71  | 0.48  |
|                                                           | AcI-R        | 13.77    | 25.27    | 23.74    | 27.73   | 33.00 | -0.62 | 0.54  |
|                                                           | AcI-L        | 13.67    | 22.56    | 23.34    | 22.32   | 30.00 | -0.88 | 0.38  |
|                                                           | AcI- tot     | 13.82    | 20.21    | 23.41    | 22.72   | 29.00 | -0.97 | 0.33  |
|                                                           | FCI-MM-R     | 113.96   | 95.55    | 127.23   | 98.96   | 36.00 | -0.35 | 0.72  |
|                                                           | FCI-MM-L     | 76.54    | 32.95    | 108.20   | 87.51   | 32.00 | -0.71 | 0.48  |
|                                                           | FCI-MM-tot   | 87.93    | 56.05    | 112.28   | 91.00   | 36.00 | -0.35 | 0.72  |
|                                                           | FCSI-MM      | 7.95     | 36.07    | 10.94    | 35.63   | 35.00 | 0.44  | 0.66  |
|                                                           | FCAI-R       | 25.75    | 28.25    | 46.63    | 34.66   | 25.00 | -1.32 | 0.19  |
|                                                           | FCAI-L       | 30.30    | 37.02    | 45.41    | 39.42   | 30.00 | -0.88 | 0.38  |
|                                                           | FCAI-tot     | 30.32    | 24.32    | 45.93    | 29.67   | 22.00 | -1.59 | 0.11  |
|                                                           | POC          | 115.22   | 25.76    | 110.21   | 39.53   | 31.00 | 0.79  | 0.43  |
|                                                           | TC           | -2953.70 | 10727.11 | -978.52  | 8422.87 | 35.00 | -0.44 | 0.66  |
|                                                           | SCM-R        | 23.18    | 14.18    | 23.51    | 16.70   | 37.00 | 0.26  | 0.79  |
|                                                           | SCM-L        | 23.19    | 21.48    | 20.88    | 8.23    | 35.00 | -0.44 | 0.66  |
|                                                           | SCM-tot      | 23.18    | 17.51    | 22.20    | 9.39    | 34.00 | -0.53 | 0.60  |
|                                                           | AsI-SCM      | 4.65     | 14.05    | -0.39    | 29.02   | 26.00 | 1.24  | 0.22  |
|                                                           | FCI-SCM-R    | 6.76     | 5.31     | 10.56    | 9.25    | 32.00 | -0.71 | 0.48  |

|                    |       |       |        |        |       |       |       |
|--------------------|-------|-------|--------|--------|-------|-------|-------|
| FCI-SCM-L          | 7.03  | 5.88  | 7.73   | 2.13   | 21.00 | -1.68 | 0.09  |
| FCI-SCM- tot       | 6.85  | 5.57  | 8.51   | 4.96   | 28.00 | -1.06 | 0.29  |
| FCSI-SCM           | -2.22 | 8.40  | -0.38  | 42.14  | 37.00 | -0.26 | 0.79  |
| UT-R               | 11.59 | 8.34  | 11.29  | 7.11   | 40.00 | 0.00  | 1.00  |
| UT-L               | 9.46  | 6.17  | 8.13   | 4.98   | 39.00 | 0.09  | 0.93  |
| UT-tot             | 10.52 | 7.11  | 9.71   | 5.03   | 38.00 | -0.18 | 0.86  |
| AsI -UT            | 6.77  | 16.92 | 11.14  | 33.55  | 35.00 | -0.44 | 0.66  |
| FCI-UT-R           | 2.29  | 1.53  | 1.79   | 1.29   | 29.00 | 0.97  | 0.33  |
| FCI-UT-L           | 1.48  | 0.82  | 1.55   | 0.33   | 37.00 | -0.26 | 0.79  |
| FCI-UT-tot         | 1.36  | 0.47  | 1.45   | 0.61   | 38.00 | -0.18 | 0.86  |
| FCSI-UT            | 16.72 | 36.52 | -0.26  | 26.18  | 31.00 | 0.79  | 0.43  |
| <b>MVC-TA-R</b>    | 91.66 | 33.41 | 97.90  | 41.49  | 37.00 | -0.26 | 0.79  |
| <b>MVC-TA-L</b>    | 96.76 | 24.98 | 102.95 | 42.03  | 40.00 | 0.00  | 1.00  |
| <b>MVC-TA-tot</b>  | 93.89 | 28.59 | 99.79  | 41.78  | 39.00 | -0.09 | 0.93  |
| <b>MVC-MM-R</b>    | 71.34 | 38.46 | 99.97  | 50.88  | 27.00 | -1.15 | 0.25  |
| <b>MVC-MM-L</b>    | 72.89 | 36.76 | 91.00  | 49.57  | 34.00 | -0.53 | 0.60  |
| <b>MVC-MM-tot</b>  | 71.65 | 36.81 | 95.07  | 50.46  | 31.00 | -0.79 | 0.43  |
| <b>MVC-SCM-R</b>   | 60.89 | 32.20 | 226.93 | 323.05 | 14.00 | -2.30 | 0.02* |
| <b>MVC-SCM-L</b>   | 69.87 | 39.00 | 144.05 | 101.67 | 16.00 | -2.12 | 0.03* |
| <b>MVC-SCM-tot</b> | 65.14 | 34.83 | 175.11 | 184.71 | 12.00 | -2.47 | 0.01* |
| <b>MVC-UT-R</b>    | 77.97 | 31.44 | 78.01  | 43.63  | 35.00 | 0.44  | 0.66  |
| <b>MVC-UT-L</b>    | 83.15 | 27.31 | 84.59  | 29.93  | 36.00 | -0.35 | 0.72  |
| <b>MVC-UT-tot</b>  | 80.85 | 24.64 | 80.75  | 34.40  | 38.00 | 0.18  | 0.86  |

AcI— activity index; AEO— abdominal external oblique muscle; AsI — asymmetry index; BB — biceps brachii muscle; ES—effect size; FCAI— Functional Clenching Activity Index; FCI — Functional Clenching Index; FCoI— Functional Contraction Index; FCoSI— Functional Contraction Symmetry Index; FCSI— Functional Clenching Symmetry Index; L— left side; MM — the superficial part of the masseter muscle; MVC— maximum voluntary contraction; n— individuals in the sample; POC— percentage overlapping coefficient; R— right side; RA-lo — the lower part of the rectus abdominis muscle; RA-up— the upper part of the rectus abdominis muscle; SCM — the middle part of the sternocleidomastoid muscle; SD — standard deviation; TA — the anterior part of the temporalis muscle; TC— torque coefficient; U— the difference between the two rank totals; UT— the upper part of the trapezius muscle; Z— the Mann-Whitney U test; \* significant difference.

**Table S5.** Comparison of bioelectrical activity findings of masticatory and cervical spine muscles in emmetropic subjects.

|                                              |             | Without Paralysis of Accommodation |         | Accommodation Paralysis in The Right Eye |        | Accommodation Paralysis in The Left Eye |        | H    | p    |
|----------------------------------------------|-------------|------------------------------------|---------|------------------------------------------|--------|-----------------------------------------|--------|------|------|
|                                              |             | Mean                               | SD      | Mean                                     | SD     | Mean                                    | SD     |      |      |
| <b>Rest</b>                                  | TA-R        | 5.39                               | 2.74    | 4.94                                     | 1.79   | 4.99                                    | 2.46   | 0.39 | 0.82 |
|                                              | TA-L        | 8.64                               | 6.71    | 7.10                                     | 3.48   | 6.47                                    | 3.47   | 0.32 | 0.85 |
|                                              | TA-tot      | 7.02                               | 3.99    | 6.02                                     | 1.73   | 5.73                                    | 2.24   | 0.17 | 0.91 |
|                                              | AsI -TA     | -15.86                             | 30.94   | -14.30                                   | 28.76  | -9.34                                   | 30.08  | 0.28 | 0.86 |
|                                              | MM-R        | 3.91                               | 2.91    | 3.91                                     | 3.49   | 4.00                                    | 2.49   | 0.11 | 0.94 |
|                                              | MM-L        | 3.77                               | 3.83    | 4.73                                     | 4.01   | 3.99                                    | 2.45   | 1.02 | 0.59 |
|                                              | MM-tot      | 3.84                               | 3.29    | 4.32                                     | 3.73   | 4.00                                    | 2.28   | 0.85 | 0.65 |
|                                              | AsI -MM     | 9.67                               | 37.37   | -10.41                                   | 13.24  | -1.86                                   | 24.63  | 3.09 | 0.21 |
|                                              | AcI-R       | -18.14                             | 38.49   | -18.12                                   | 33.52  | -13.11                                  | 28.54  | 0.18 | 0.91 |
|                                              | AcI-L       | -36.77                             | 41.07   | -22.12                                   | 33.63  | -20.94                                  | 32.47  | 0.71 | 0.70 |
|                                              | AcI-tot     | -29.78                             | 36.33   | -22.52                                   | 31.79  | -18.65                                  | 25.53  | 1.79 | 0.40 |
|                                              | POC         | 92.98                              | 45.83   | 82.55                                    | 33.96  | 94.08                                   | 37.71  | 0.34 | 0.84 |
|                                              | TC          | -337.67                            | 634.41  | -134.22                                  | 449.11 | -149.89                                 | 433.21 | 0.60 | 0.74 |
|                                              | SCM-R       | 3.66                               | 1.41    | 3.47                                     | 1.52   | 4.00                                    | 1.75   | 0.24 | 0.88 |
|                                              | SCM-L       | 3.45                               | 1.39    | 4.22                                     | 3.37   | 3.29                                    | 0.80   | 0.04 | 0.97 |
|                                              | SCM-tot     | 3.55                               | 0.86    | 3.84                                     | 1.93   | 3.64                                    | 1.18   | 0.17 | 0.91 |
|                                              | AsI -SCM    | 3.52                               | 26.76   | -3.86                                    | 25.84  | 6.82                                    | 16.34  | 1.33 | 0.51 |
|                                              | UT-R        | 8.33                               | 7.43    | 5.39                                     | 5.17   | 6.80                                    | 5.99   | 0.87 | 0.64 |
|                                              | UT-L        | 10.14                              | 12.96   | 5.40                                     | 3.47   | 28.01                                   | 64.22  | 1.44 | 0.48 |
|                                              | UT-tot      | 9.24                               | 9.45    | 5.39                                     | 3.85   | 17.40                                   | 31.35  | 1.07 | 0.58 |
|                                              | AsI -UT     | -5.50                              | 44.04   | -6.07                                    | 32.02  | -13.03                                  | 39.65  | 0.28 | 0.86 |
| <b>Clenching in The Intercuspal Position</b> | TA-R        | 178.86                             | 81.31   | 168.65                                   | 79.71  | 188.30                                  | 82.96  | 0.46 | 0.79 |
|                                              | TA-L        | 167.54                             | 88.51   | 161.52                                   | 86.57  | 186.69                                  | 88.70  | 0.65 | 0.72 |
|                                              | TA-tot      | 173.20                             | 77.02   | 165.09                                   | 75.66  | 187.49                                  | 76.59  | 0.40 | 0.82 |
|                                              | AsI -TA     | 3.16                               | 16.44   | 1.72                                     | 18.56  | 1.08                                    | 19.78  | 0.07 | 0.97 |
|                                              | FCI-TA-R    | 40.12                              | 24.78   | 37.08                                    | 19.83  | 50.20                                   | 36.00  | 0.52 | 0.77 |
|                                              | FCI-TA-L    | 30.80                              | 28.34   | 29.22                                    | 29.05  | 46.40                                   | 47.36  | 0.69 | 0.70 |
|                                              | FCI-TA -tot | 31.77                              | 23.78   | 30.39                                    | 22.62  | 44.35                                   | 39.29  | 0.60 | 0.73 |
|                                              | FCSI-TA     | 17.16                              | 35.12   | 15.03                                    | 31.78  | 9.77                                    | 36.01  | 0.24 | 0.88 |
|                                              | MM-R        | 220.49                             | 162.32  | 225.16                                   | 179.85 | 236.27                                  | 187.08 | 0.03 | 0.98 |
|                                              | MM-L        | 189.96                             | 123.40  | 186.74                                   | 124.11 | 199.55                                  | 130.05 | 0.10 | 0.95 |
|                                              | MM-tot      | 205.23                             | 138.39  | 205.95                                   | 148.79 | 217.91                                  | 155.30 | 0.07 | 0.96 |
|                                              | AsI -MM     | 2.78                               | 17.87   | 4.30                                     | 15.90  | 3.69                                    | 15.61  | 0.05 | 0.97 |
|                                              | AcI-R       | -1.63                              | 29.26   | 0.94                                     | 29.39  | -2.13                                   | 31.27  | 0.20 | 0.90 |
|                                              | AcI-L       | -1.34                              | 24.69   | -1.19                                    | 26.52  | -4.04                                   | 31.03  | 0.10 | 0.95 |
|                                              | AcI- tot    | -1.39                              | 23.97   | -0.26                                    | 24.99  | -3.42                                   | 27.85  | 0.10 | 0.95 |
|                                              | FCI-MM-R    | 89.03                              | 91.11   | 89.59                                    | 88.90  | 92.22                                   | 94.61  | 0.00 | 1.00 |
|                                              | FCI-MM-L    | 1869.68                            | 5399.22 | 55.94                                    | 41.27  | 59.47                                   | 43.28  | 0.53 | 0.76 |
|                                              | FCI-MM-tot  | 81.57                              | 69.38   | 67.52                                    | 53.07  | 70.85                                   | 60.97  | 0.17 | 0.91 |
|                                              | FCSI-MM     | -9.69                              | 43.48   | 14.14                                    | 24.72  | 5.57                                    | 33.02  | 2.30 | 0.31 |
|                                              | FCAI-R      | 15.18                              | 41.13   | 17.50                                    | 43.76  | 10.90                                   | 33.53  | 0.13 | 0.93 |
|                                              | FCAI-L      | 31.13                              | 51.14   | 18.58                                    | 46.78  | 14.21                                   | 38.64  | 0.34 | 0.84 |

|                                                |                 |          |          |          |          |          |          |      |      |
|------------------------------------------------|-----------------|----------|----------|----------|----------|----------|----------|------|------|
| Clenching<br>on<br>Dental<br>Cotton<br>Rollers | FCAI-tot        | 25.93    | 43.97    | 20.62    | 43.40    | 13.94    | 30.84    | 0.69 | 0.70 |
|                                                | POC             | 109.84   | 22.45    | 109.61   | 23.44    | 106.91   | 21.51    | 0.11 | 0.94 |
|                                                | TC              | -1921.48 | 11549.16 | -3128.33 | 11170.30 | -3510.74 | 12302.01 | 0.45 | 0.79 |
|                                                | SCM-R           | 11.73    | 7.92     | 13.03    | 12.47    | 14.78    | 12.90    | 0.17 | 0.91 |
|                                                | SCM-L           | 12.61    | 12.66    | 16.09    | 18.54    | 16.70    | 19.16    | 0.24 | 0.88 |
|                                                | SCM-tot         | 12.17    | 10.00    | 14.56    | 15.37    | 15.74    | 15.73    | 0.02 | 0.99 |
|                                                | AsI -SCM        | 1.25     | 15.73    | -5.36    | 19.20    | -1.02    | 17.53    | 0.65 | 0.72 |
|                                                | FCI-SCM-R       | 3.46     | 2.38     | 4.00     | 4.13     | 3.87     | 3.66     | 0.17 | 0.91 |
|                                                | FCI-SCM-L       | 4.79     | 6.18     | 5.12     | 6.86     | 4.82     | 5.12     | 0.22 | 0.89 |
|                                                | FCI-SCM-<br>tot | 3.93     | 3.94     | 4.50     | 5.46     | 4.32     | 4.43     | 0.07 | 0.96 |
|                                                | FCSI-SCM        | -2.39    | 27.06    | -0.76    | 19.04    | -7.72    | 13.78    | 0.26 | 0.87 |
|                                                | UT-R            | 7.67     | 5.95     | 10.28    | 9.54     | 8.58     | 7.08     | 0.17 | 0.91 |
|                                                | UT-L            | 9.97     | 9.39     | 6.35     | 3.73     | 7.26     | 4.23     | 0.91 | 0.63 |
|                                                | UT-tot          | 8.82     | 6.32     | 8.31     | 6.05     | 7.92     | 5.14     | 0.05 | 0.97 |
|                                                | ASI-UT          | -12.79   | 32.67    | 8.65     | 27.71    | 1.79     | 32.24    | 3.56 | 0.16 |
|                                                | FCI-UT-R        | 1.29     | 1.14     | 2.54     | 2.71     | 1.42     | 0.54     | 2.40 | 0.30 |
|                                                | FCI-UT-L        | 1.51     | 1.22     | 1.30     | 0.64     | 1.19     | 0.69     | 0.03 | 0.98 |
|                                                | FCI-UT-tot      | 1.10     | 0.34     | 1.73     | 1.49     | 1.17     | 0.53     | 0.15 | 0.92 |
|                                                | FCSI-UT         | 7.88     | 48.49    | 15.65    | 25.52    | 10.39    | 38.79    | 1.03 | 0.59 |
|                                                | TA-R            | 179.70   | 46.86    | 190.23   | 70.03    | 206.81   | 62.67    | 0.91 | 0.63 |
|                                                | TA-L            | 171.31   | 65.77    | 179.31   | 91.68    | 190.63   | 72.09    | 0.27 | 0.87 |
|                                                | TA-tot          | 175.51   | 46.69    | 184.77   | 75.82    | 198.72   | 59.45    | 0.96 | 0.62 |
|                                                | AsI -TA         | 4.14     | 19.12    | 5.76     | 17.90    | 5.34     | 17.42    | 0.10 | 0.95 |
|                                                | FCI-TA-R        | 39.60    | 18.38    | 41.80    | 17.23    | 51.39    | 29.41    | 1.06 | 0.58 |
|                                                | FCI-TA-L        | 32.24    | 23.91    | 33.50    | 29.23    | 47.72    | 46.43    | 0.52 | 0.77 |
|                                                | FCI-TA -tot     | 33.06    | 19.44    | 34.94    | 22.02    | 46.62    | 37.29    | 0.45 | 0.79 |
|                                                | FCSI-TA         | 18.46    | 31.00    | 19.08    | 30.49    | 13.90    | 29.69    | 0.22 | 0.89 |
|                                                | MM-R            | 243.19   | 119.93   | 290.44   | 185.96   | 304.64   | 159.72   | 1.03 | 0.59 |
|                                                | MM-L            | 218.81   | 78.91    | 257.19   | 138.20   | 258.93   | 117.29   | 0.47 | 0.79 |
|                                                | MM-tot          | 231.00   | 96.87    | 273.81   | 157.72   | 281.79   | 133.57   | 0.87 | 0.64 |
|                                                | AsI -MM         | 2.81     | 14.60    | 3.86     | 17.75    | 5.65     | 17.31    | 0.47 | 0.79 |
|                                                | AcI-R           | 10.92    | 22.73    | 14.28    | 25.11    | 13.77    | 25.27    | 0.10 | 0.95 |
|                                                | AcI-L           | 12.50    | 17.86    | 16.40    | 21.49    | 13.67    | 22.56    | 0.33 | 0.84 |
|                                                | AcI- tot        | 11.41    | 15.30    | 15.39    | 19.82    | 13.82    | 20.21    | 0.09 | 0.95 |
|                                                | FCI-MM-R        | 88.98    | 73.72    | 109.62   | 89.82    | 113.96   | 95.55    | 0.13 | 0.93 |
|                                                | FCI-MM-L        | 3291.50  | 9653.32  | 71.59    | 40.86    | 76.54    | 32.95    | 0.15 | 0.92 |
|                                                | FCI-MM-tot      | 90.11    | 68.10    | 85.54    | 55.99    | 87.93    | 56.05    | 0.00 | 0.99 |
|                                                | FCSI-MM         | -6.97    | 40.75    | 13.89    | 24.92    | 7.95     | 36.07    | 2.00 | 0.36 |
|                                                | FCAI-R          | 26.93    | 35.05    | 28.44    | 39.23    | 25.75    | 28.25    | 0.74 | 0.96 |
|                                                | FCAI-L          | 42.12    | 46.69    | 32.79    | 37.97    | 30.30    | 37.02    | 0.55 | 0.75 |
|                                                | FCAI-tot        | 37.60    | 38.42    | 33.53    | 34.89    | 30.32    | 24.32    | 0.52 | 0.77 |
|                                                | POC             | 110.09   | 23.08    | 113.99   | 28.40    | 115.22   | 25.76    | 0.34 | 0.84 |
|                                                | TC              | -1597.41 | 9833.20  | -2233.70 | 11314.51 | -2953.70 | 10727.11 | 0.26 | 0.87 |
|                                                | SCM-R           | 32.64    | 51.80    | 17.52    | 11.15    | 23.18    | 14.18    | 1.01 | 0.60 |
|                                                | SCM-L           | 15.47    | 9.79     | 21.47    | 20.50    | 23.19    | 21.48    | 0.91 | 0.63 |
|                                                | SCM-tot         | 24.05    | 26.47    | 19.49    | 15.13    | 23.18    | 17.51    | 0.45 | 0.79 |
|                                                | AsI-SCM         | 11.56    | 33.94    | -3.44    | 20.47    | 4.65     | 14.05    | 1.14 | 0.56 |

|                    |        |        |       |       |       |       |      |      |
|--------------------|--------|--------|-------|-------|-------|-------|------|------|
| FCI-SCM-R          | 9.50   | 14.41  | 5.21  | 3.31  | 6.76  | 5.31  | 0.53 | 0.76 |
| FCI-SCM-L          | 5.45   | 4.93   | 6.84  | 7.60  | 7.03  | 5.88  | 1.19 | 0.55 |
| FCI-SCM-tot        | 7.39   | 8.12   | 5.92  | 5.46  | 6.85  | 5.57  | 0.67 | 0.71 |
| FCSI-SCM           | 8.08   | 41.04  | 0.10  | 26.70 | -2.22 | 8.40  | 0.07 | 0.96 |
| UT-R               | 10.27  | 7.09   | 9.97  | 8.36  | 11.59 | 8.34  | 0.18 | 0.91 |
| UT-L               | 7.25   | 2.91   | 7.41  | 4.18  | 9.46  | 6.17  | 0.30 | 0.86 |
| UT-tot             | 8.76   | 4.38   | 8.69  | 5.66  | 10.52 | 7.11  | 0.32 | 0.85 |
| AsI-UT             | 10.48  | 25.49  | 3.36  | 24.10 | 6.77  | 16.92 | 0.52 | 0.77 |
| FCI-UT-R           | 2.06   | 1.93   | 2.75  | 3.15  | 2.29  | 1.53  | 0.74 | 0.68 |
| FCI-UT-L           | 1.44   | 1.11   | 1.51  | 0.64  | 1.48  | 0.82  | 0.26 | 0.87 |
| FCI-UT-tot         | 1.25   | 0.66   | 1.14  | 0.34  | 1.36  | 0.47  | 1.27 | 0.52 |
| FCSI-UT            | 15.30  | 40.19  | 9.88  | 28.59 | 16.72 | 36.52 | 0.22 | 0.89 |
| <b>MVC-TA-R</b>    | 99.03  | 38.02  | 89.93 | 38.46 | 91.66 | 33.41 | 0.28 | 0.86 |
| <b>MVC-TA-L</b>    | 98.33  | 32.12  | 94.72 | 33.43 | 96.76 | 24.98 | 0.17 | 0.91 |
| <b>MVC-TA-tot</b>  | 97.81  | 34.47  | 91.91 | 35.62 | 93.89 | 28.59 | 0.09 | 0.95 |
| <b>MVC-MM-R</b>    | 87.21  | 52.65  | 72.15 | 37.63 | 71.34 | 38.46 | 0.46 | 0.79 |
| <b>MVC-MM-L</b>    | 82.97  | 48.53  | 70.94 | 34.79 | 72.89 | 36.76 | 0.08 | 0.96 |
| <b>MVC-MM-tot</b>  | 84.76  | 49.10  | 71.02 | 34.99 | 71.65 | 36.81 | 0.40 | 0.82 |
| <b>MVC-SCM-R</b>   | 66.41  | 36.01  | 67.72 | 22.09 | 60.89 | 32.20 | 0.55 | 0.75 |
| <b>MVC-SCM-L</b>   | 74.78  | 26.69  | 72.34 | 28.23 | 69.87 | 39.00 | 0.81 | 0.66 |
| <b>MVC-SCM-tot</b> | 65.07  | 31.85  | 68.92 | 22.22 | 65.14 | 34.83 | 0.43 | 0.80 |
| <b>MVC-UT-R</b>    | 77.76  | 32.93  | 99.89 | 33.11 | 77.97 | 31.44 | 1.73 | 0.42 |
| <b>MVC-UT-L</b>    | 151.93 | 168.84 | 87.12 | 20.03 | 83.15 | 27.31 | 1.56 | 0.45 |
| <b>MVC-UT-tot</b>  | 107.84 | 80.67  | 94.00 | 23.70 | 80.85 | 24.64 | 1.27 | 0.52 |

AcI— activity index; AEO— abdominal external oblique muscle; AsI— asymmetry index; BB — biceps brachii muscle; ES—effect size; FCAI— Functional Clenching Activity Index; FCI — Functional Clenching Index; FCoI— Functional Contraction Index; FCoSI— Functional Contraction Symmetry Index; FCSI— Functional Clenching Symmetry Index; L— left side; MM — the superficial part of the masseter muscle; MVC— maximum voluntary contraction; n— individuals in the sample; POC— percentage overlapping coefficient; R— right side; RA-lo — the lower part of the rectus abdominis muscle; RA-up— the upper part of the rectus abdominis muscle; SCM — the middle part of the sternocleidomastoid muscle; SD — standard deviation; TA — the anterior part of the temporalis muscle; TC— torque coefficient; U— the difference between the two rank totals; UT— the upper part of the trapezius muscle H— the Kruskal-Wallis test;

**Table S6.** Comparison of bioelectrical activity findings of masticatory and cervical spine muscles in myopic subjects.

|                                              |             | Without Paralysis of Accommodation |        | Accommodation Paralysis in The Right Eye |         | Accommodation Paralysis in The Left Eye |         | H    | p    |
|----------------------------------------------|-------------|------------------------------------|--------|------------------------------------------|---------|-----------------------------------------|---------|------|------|
|                                              |             | Mean                               | SD     | Mean                                     | SD      | Mean                                    | SD      |      |      |
| <b>Rest</b>                                  | TA-R        | 6.49                               | 5.38   | 7.31                                     | 5.91    | 7.03                                    | 5.35    | 0.74 | 0.96 |
|                                              | TA-L        | 7.38                               | 4.21   | 7.02                                     | 4.50    | 7.11                                    | 3.60    | 0.05 | 0.97 |
|                                              | TA-tot      | 6.93                               | 4.54   | 7.17                                     | 5.06    | 7.07                                    | 4.16    | 0.12 | 0.93 |
|                                              | ASI-TA      | -13.02                             | 31.95  | -5.23                                    | 24.10   | -7.22                                   | 25.10   | 0.18 | 0.91 |
|                                              | MM-R        | 3.97                               | 3.39   | 3.37                                     | 1.63    | 3.21                                    | 2.05    | 0.26 | 0.87 |
|                                              | MM-L        | 5.86                               | 8.66   | 6.31                                     | 9.96    | 6.39                                    | 11.12   | 0.87 | 0.64 |
|                                              | MM-tot      | 4.91                               | 5.95   | 4.84                                     | 5.52    | 4.80                                    | 6.44    | 1.07 | 0.58 |
|                                              | AsI-MM      | -7.00                              | 22.67  | -9.00                                    | 33.79   | -10.60                                  | 27.35   | 0.24 | 0.88 |
|                                              | AcI-R       | -18.09                             | 39.86  | -24.37                                   | 35.68   | -29.20                                  | 35.68   | 0.11 | 0.94 |
|                                              | AcI-L       | -25.05                             | 38.65  | -20.27                                   | 39.08   | -26.99                                  | 39.13   | 0.27 | 0.87 |
|                                              | AcI-tot     | -23.96                             | 34.16  | -20.82                                   | 30.51   | -27.00                                  | 35.37   | 0.34 | 0.84 |
|                                              | POC         | 86.25                              | 36.61  | 88.89                                    | 27.59   | 89.24                                   | 38.89   | 0.04 | 0.97 |
|                                              | TC          | 99.56                              | 620.33 | 323.44                                   | 1133.55 | 310.22                                  | 1198.30 | 2.26 | 0.95 |
|                                              | SCM-R       | 2.89                               | 1.61   | 4.24                                     | 3.81    | 4.45                                    | 6.60    | 2.25 | 0.32 |
|                                              | SCM-L       | 3.01                               | 1.23   | 3.05                                     | 1.04    | 2.66                                    | 0.63    | 0.29 | 0.86 |
|                                              | SCM-tot     | 2.95                               | 0.98   | 3.64                                     | 1.95    | 3.56                                    | 3.27    | 1.51 | 0.47 |
|                                              | AsI-SCM     | -3.92                              | 27.43  | 6.70                                     | 26.14   | 1.65                                    | 33.94   | 0.77 | 0.68 |
|                                              | UT-R        | 5.31                               | 3.43   | 6.64                                     | 6.64    | 8.36                                    | 6.94    | 0.77 | 0.68 |
|                                              | UT-L        | 3.81                               | 1.22   | 4.88                                     | 3.07    | 5.25                                    | 2.94    | 1.63 | 0.44 |
|                                              | UT-tot      | 4.56                               | 1.70   | 5.76                                     | 3.77    | 6.81                                    | 4.63    | 1.00 | 0.60 |
|                                              | AsI-UT      | 6.42                               | 39.22  | 1.46                                     | 43.23   | 10.71                                   | 36.98   | 0.07 | 0.96 |
| <b>Clenching in The Intercuspal Position</b> | TA-R        | 142.63                             | 43.19  | 145.50                                   | 45.88   | 155.70                                  | 53.57   | 0.22 | 0.89 |
|                                              | TA-L        | 150.33                             | 52.85  | 130.69                                   | 69.60   | 158.86                                  | 59.84   | 0.62 | 0.73 |
|                                              | TA-tot      | 146.48                             | 43.56  | 138.09                                   | 44.35   | 157.28                                  | 47.54   | 0.47 | 0.79 |
|                                              | AsI -TA     | -2.73                              | 15.28  | 8.73                                     | 36.70   | -1.25                                   | 18.92   | 0.07 | 0.96 |
|                                              | FCI-TA-R    | 41.58                              | 31.35  | 38.88                                    | 30.06   | 36.78                                   | 23.77   | 0.05 | 0.97 |
|                                              | FCI-TA-L    | 30.53                              | 23.97  | 26.68                                    | 21.59   | 29.89                                   | 21.32   | 0.27 | 0.87 |
|                                              | FCI-TA -tot | 31.51                              | 21.62  | 30.23                                    | 20.49   | 31.77                                   | 20.78   | 0.05 | 0.97 |
|                                              | FCSI-TA     | 10.38                              | 34.45  | 12.57                                    | 41.76   | 5.63                                    | 27.37   | 0.10 | 0.95 |
|                                              | MM-R        | 297.11                             | 204.74 | 302.33                                   | 204.12  | 326.11                                  | 239.26  | 0.07 | 0.96 |
|                                              | MM-L        | 261.62                             | 191.41 | 284.64                                   | 208.67  | 276.94                                  | 221.89  | 0.11 | 0.94 |
|                                              | MM-tot      | 279.37                             | 196.66 | 293.48                                   | 205.02  | 301.53                                  | 228.79  | 0.07 | 0.96 |
|                                              | AsI -MM     | 3.89                               | 14.50  | 2.65                                     | 11.26   | 7.92                                    | 13.71   | 0.80 | 0.67 |
|                                              | AcI-R       | 22.78                              | 34.00  | 23.55                                    | 31.70   | 23.28                                   | 32.19   | 0.03 | 0.98 |
|                                              | AcI-L       | 16.09                              | 27.94  | 29.34                                    | 37.79   | 14.09                                   | 30.48   | 1.23 | 0.54 |
|                                              | AcI- tot    | 19.46                              | 29.78  | 24.57                                    | 29.37   | 18.69                                   | 29.89   | 0.32 | 0.85 |
|                                              | FCI-MM-R    | 128.46                             | 120.79 | 126.61                                   | 122.52  | 146.85                                  | 144.60  | 0.17 | 0.91 |
|                                              | FCI-MM-L    | 90.51                              | 89.03  | 87.44                                    | 79.95   | 109.72                                  | 119.72  | 0.05 | 0.97 |
|                                              | FCI-MM-tot  | 104.47                             | 100.56 | 97.55                                    | 88.19   | 123.98                                  | 132.11  | 0.03 | 0.98 |
|                                              | FCSI-MM     | 10.49                              | 31.84  | 11.84                                    | 35.92   | 16.91                                   | 33.05   | 0.09 | 0.95 |
|                                              | FCAI-R      | 33.42                              | 45.60  | 40.32                                    | 40.75   | 44.88                                   | 38.82   | 0.39 | 0.82 |
|                                              | FCAI-L      | 39.47                              | 33.91  | 45.49                                    | 34.74   | 37.77                                   | 38.68   | 0.32 | 0.85 |

|                                                |             |          |         |         |         |          |         |      |      |
|------------------------------------------------|-------------|----------|---------|---------|---------|----------|---------|------|------|
| Clenching<br>on<br>Dental<br>Cotton<br>Rollers | FCAI-tot    | 38.81    | 35.48   | 41.74   | 28.82   | 40.87    | 34.05   | 0.09 | 0.95 |
|                                                | POC         | 106.75   | 22.74   | 116.49  | 44.67   | 112.58   | 28.64   | 0.17 | 0.91 |
|                                                | TC          | -4318.59 | 6235.52 | -288.00 | 8012.85 | -5234.44 | 7683.73 | 1.32 | 0.51 |
|                                                | SCM-R       | 18.98    | 12.58   | 37.80   | 57.72   | 59.02    | 107.21  | 0.96 | 0.61 |
|                                                | SCM-L       | 27.54    | 24.85   | 19.96   | 9.49    | 28.06    | 17.40   | 0.61 | 0.73 |
|                                                | SCM-tot     | 23.26    | 16.55   | 28.88   | 29.41   | 43.54    | 58.20   | 0.46 | 0.79 |
|                                                | AsI -SCM    | -13.89   | 22.08   | 6.14    | 34.81   | 3.61     | 33.82   | 2.21 | 0.33 |
|                                                | FCI-SCM-R   | 8.32     | 7.47    | 14.14   | 23.72   | 21.53    | 35.31   | 0.38 | 0.82 |
|                                                | FCI-SCM-L   | 11.07    | 12.23   | 7.44    | 5.20    | 11.09    | 7.25    | 1.10 | 0.57 |
|                                                | FCI-SCM-tot | 8.44     | 6.20    | 10.14   | 11.58   | 16.26    | 21.16   | 0.47 | 0.79 |
|                                                | FCSI-SCM    | -7.45    | 33.26   | -1.84   | 42.26   | 1.40     | 41.22   | 0.32 | 0.85 |
|                                                | UT-R        | 6.32     | 5.04    | 8.72    | 7.70    | 7.84     | 5.04    | 1.12 | 0.57 |
|                                                | UT-L        | 4.60     | 1.23    | 6.75    | 3.39    | 6.01     | 2.73    | 2.26 | 0.32 |
|                                                | UT-tot      | 5.46     | 2.54    | 7.73    | 5.23    | 6.93     | 2.65    | 1.51 | 0.47 |
|                                                | AsI -UT     | 2.05     | 41.52   | -2.53   | 33.79   | 4.23     | 41.35   | 0.07 | 0.96 |
|                                                | FCI-UT-R    | 1.16     | 0.38    | 1.34    | 0.38    | 1.09     | 0.36    | 0.91 | 0.63 |
|                                                | FCI-UT-L    | 1.31     | 0.56    | 1.57    | 0.91    | 1.29     | 0.47    | 0.74 | 0.68 |
|                                                | FCI-UT-tot  | 1.23     | 0.42    | 1.34    | 0.39    | 1.18     | 0.36    | 0.90 | 0.63 |
|                                                | FCSI-UT     | -5.25    | 16.88   | -3.89   | 22.41   | -7.20    | 16.80   | 0.27 | 0.87 |
|                                                | TA-R        | 140.31   | 56.45   | 162.56  | 65.42   | 171.46   | 65.71   | 1.15 | 0.56 |
|                                                | TA-L        | 140.89   | 44.62   | 153.40  | 43.72   | 160.15   | 47.38   | 2.18 | 0.33 |
|                                                | TA-tot      | 140.60   | 36.67   | 157.98  | 44.34   | 165.80   | 41.62   | 2.00 | 0.36 |
|                                                | AsI-TA      | -1.82    | 23.31   | 0.64    | 19.91   | 1.43     | 21.76   | 0.10 | 0.95 |
|                                                | FCI-TA-R    | 40.29    | 32.37   | 43.93   | 39.66   | 41.01    | 32.14   | 0.07 | 0.96 |
|                                                | FCI-TA-L    | 25.99    | 17.14   | 30.98   | 19.97   | 28.44    | 15.65   | 0.40 | 0.82 |
|                                                | FCI-TA -tot | 29.04    | 19.04   | 35.04   | 26.24   | 32.41    | 19.81   | 0.22 | 0.89 |
|                                                | FCSI-TA     | 10.76    | 35.17   | 5.79    | 27.10   | 7.73     | 29.97   | 0.03 | 0.98 |
|                                                | MM-R        | 273.97   | 116.03  | 307.34  | 140.65  | 309.06   | 150.30  | 0.68 | 0.71 |
|                                                | MM-L        | 258.29   | 109.04  | 290.20  | 147.52  | 287.96   | 148.07  | 0.07 | 0.96 |
|                                                | MM-tot      | 266.13   | 104.66  | 298.77  | 138.10  | 298.51   | 143.68  | 0.17 | 0.91 |
|                                                | AsI-MM      | 0.71     | 19.03   | 1.60    | 18.06   | 1.93     | 18.00   | 0.04 | 0.97 |
|                                                | AcI-R       | 28.42    | 28.68   | 26.64   | 26.74   | 23.74    | 27.73   | 0.32 | 0.85 |
|                                                | AcI-L       | 26.90    | 17.66   | 26.24   | 17.83   | 23.34    | 22.32   | 0.38 | 0.82 |
|                                                | AcI- tot    | 27.63    | 19.49   | 26.44   | 20.38   | 23.41    | 22.72   | 0.30 | 0.86 |
|                                                | FCI-MM-R    | 107.09   | 74.80   | 114.68  | 76.12   | 127.23   | 98.96   | 0.15 | 0.92 |
|                                                | FCI-MM-L    | 85.99    | 50.31   | 92.48   | 60.61   | 108.20   | 87.51   | 0.10 | 0.95 |
|                                                | FCI-MM-tot  | 92.54    | 59.53   | 93.49   | 53.29   | 112.28   | 91.00   | 0.18 | 0.91 |
|                                                | FCSI-MM     | 7.46     | 33.44   | 9.69    | 41.43   | 10.94    | 35.63   | 0.01 | 0.99 |
|                                                | FCAI-R      | 40.69    | 37.12   | 44.23   | 34.20   | 46.63    | 34.66   | 0.20 | 0.90 |
|                                                | FCAI-L      | 47.49    | 37.30   | 43.61   | 34.87   | 45.41    | 39.42   | 0.36 | 0.83 |
|                                                | FCAI-tot    | 46.81    | 30.18   | 44.00   | 25.73   | 45.93    | 29.67   | 0.40 | 0.82 |
|                                                | POC         | 106.72   | 36.07   | 109.78  | 39.49   | 110.21   | 39.53   | 0.07 | 0.96 |
|                                                | TC          | -1625.56 | 8668.20 | -797.78 | 6085.07 | -978.52  | 8422.87 | 0.10 | 0.95 |
|                                                | SCM-R       | 17.98    | 10.95   | 19.18   | 7.45    | 23.51    | 16.70   | 0.77 | 0.67 |
|                                                | SCM-L       | 18.26    | 13.04   | 19.30   | 11.26   | 20.88    | 8.23    | 1.23 | 0.54 |
|                                                | SCM-tot     | 18.12    | 11.54   | 19.24   | 8.70    | 22.20    | 9.39    | 2.32 | 0.31 |
|                                                | AsI-SCM     | -0.44    | 19.87   | 2.26    | 20.94   | -0.39    | 29.02   | 0.81 | 0.66 |



|                    |        |        |        |        |        |        |      |      |
|--------------------|--------|--------|--------|--------|--------|--------|------|------|
| FCI-SCM-R          | 8.44   | 8.76   | 6.23   | 3.77   | 10.56  | 9.25   | 1.06 | 0.58 |
| FCI-SCM-L          | 6.66   | 5.30   | 6.59   | 3.18   | 7.73   | 2.13   | 2.73 | 0.25 |
| FCI-SCM-tot        | 7.14   | 6.49   | 6.13   | 3.30   | 8.51   | 4.96   | 1.17 | 0.55 |
| FCSI-SCM           | 2.83   | 25.05  | -5.20  | 32.09  | -0.38  | 42.14  | 0.26 | 0.87 |
| UT-R               | 10.76  | 6.72   | 11.09  | 7.70   | 11.29  | 7.11   | 0.30 | 0.98 |
| UT-L               | 7.18   | 4.42   | 7.79   | 5.40   | 8.13   | 4.98   | 0.73 | 0.69 |
| UT-tot             | 8.97   | 4.85   | 9.44   | 5.77   | 9.71   | 5.03   | 0.10 | 0.95 |
| AsI-UT             | 15.08  | 38.46  | 11.20  | 37.39  | 11.14  | 33.55  | 0.17 | 0.91 |
| FCI-UT-R           | 2.77   | 2.70   | 2.67   | 2.62   | 1.79   | 1.29   | 0.22 | 0.89 |
| FCI-UT-L           | 1.78   | 0.78   | 1.73   | 1.13   | 1.55   | 0.33   | 0.96 | 0.61 |
| FCI-UT-tot         | 1.88   | 1.21   | 1.45   | 0.80   | 1.45   | 0.61   | 0.77 | 0.67 |
| FCSI-UT            | 8.38   | 28.21  | 5.72   | 42.58  | -0.26  | 26.18  | 0.68 | 0.71 |
| <b>MVC-TA-R</b>    | 110.88 | 43.36  | 98.53  | 42.11  | 97.90  | 41.49  | 0.62 | 0.73 |
| <b>MVC-TA-L</b>    | 113.01 | 49.11  | 92.29  | 53.20  | 102.95 | 42.03  | 0.95 | 0.62 |
| <b>MVC-TA-tot</b>  | 109.56 | 44.45  | 94.08  | 44.38  | 99.79  | 41.78  | 2.12 | 0.34 |
| <b>MVC-MM-R</b>    | 103.40 | 61.85  | 95.90  | 54.80  | 99.97  | 50.88  | 0.35 | 0.83 |
| <b>MVC-MM-L</b>    | 97.78  | 57.83  | 97.02  | 57.15  | 91.00  | 49.57  | 0.02 | 0.99 |
| <b>MVC-MM-tot</b>  | 99.95  | 59.68  | 95.27  | 55.20  | 95.07  | 50.46  | 0.03 | 0.98 |
| <b>MVC-SCM-R</b>   | 107.88 | 47.35  | 174.99 | 228.12 | 226.93 | 323.05 | 0.23 | 0.89 |
| <b>MVC-SCM-L</b>   | 217.74 | 307.82 | 122.75 | 77.23  | 144.05 | 101.67 | 0.17 | 0.91 |
| <b>MVC-SCM-tot</b> | 145.51 | 119.07 | 147.60 | 122.04 | 175.11 | 184.71 | 0.14 | 0.93 |
| <b>MVC-UT-R</b>    | 70.34  | 47.94  | 92.62  | 65.06  | 78.01  | 43.63  | 0.44 | 0.80 |
| <b>MVC-UT-L</b>    | 90.29  | 66.86  | 116.61 | 85.15  | 84.59  | 29.93  | 0.74 | 0.68 |
| <b>MVC-UT-tot</b>  | 77.83  | 57.72  | 95.15  | 58.48  | 80.75  | 34.40  | 0.77 | 0.67 |

AcI— activity index; AEO— abdominal external oblique muscle; AsI— asymmetry index; BB — biceps brachii muscle; ES—effect size; FCAI— Functional Clenching Activity Index; FCI — Functional Clenching Index; FCoI— Functional Contraction Index; FCoSI— Functional Contraction Symmetry Index; FCSI— Functional Clenching Symmetry Index; L— left side; MM — the superficial part of the masseter muscle; MVC— maximum voluntary contraction; n— individuals in the sample; POC— percentage overlapping coefficient; R— right side; RA-lo — the lower part of the rectus abdominis muscle; RA-up— the upper part of the rectus abdominis muscle; SCM — the middle part of the sternocleidomastoid muscle; SD — standard deviation; TA — the anterior part of the temporalis muscle; TC— torque coefficient; U— the difference between the two rank totals; UT— the upper part of the trapezius muscle; H— the Kruskal-Wallis test.

**Table S7.** Comparison of bioelectrical activity findings of postural muscles and the arm muscles in emmetropic subjects and myopic subjects (Without Paralysis of Accommodation).

|                              |           | Emmetropic Subjects |       | Myopic Subjects |       |       |       |       |
|------------------------------|-----------|---------------------|-------|-----------------|-------|-------|-------|-------|
|                              |           | Mean                | SD    | Mean            | SD    | U     | Z     | P     |
| <b>Lying<br/>Position</b>    | BB-R      | 4.11                | 2.00  | 3.76            | 2.38  | 23.50 | -0.79 | 0.43  |
|                              | BB-L      | 4.68                | 6.52  | 2.78            | 1.37  | 30.00 | 0.11  | 0.92  |
|                              | BB-tot    | 4.39                | 3.90  | 3.20            | 1.56  | 29.00 | -0.21 | 0.83  |
|                              | BB-R-%    | 58.86               | 18.25 | 51.87           | 21.41 | 30.00 | -0.11 | 0.92  |
|                              | BB-L-%    | 41.14               | 18.25 | 39.58           | 18.39 | 30.00 | 0.11  | 0.92  |
|                              | AsI-BB    | 17.71               | 36.49 | 16.24           | 31.98 | 30.00 | -0.11 | 0.92  |
|                              | RA-up-R   | 7.38                | 3.21  | 7.24            | 3.16  | 26.00 | -0.53 | 0.60  |
|                              | RA-up-L   | 6.52                | 3.26  | 6.31            | 2.75  | 28.00 | -0.32 | 0.75  |
|                              | RA-lo-R   | 4.91                | 1.73  | 3.52            | 0.87  | 14.50 | -1.75 | 0.08  |
|                              | RA-lo-L   | 10.81               | 9.67  | 4.52            | 2.47  | 17.00 | -1.48 | 0.14  |
|                              | RA-up-tot | 10.64               | 4.48  | 10.37           | 3.42  | 27.00 | -0.42 | 0.67  |
|                              | RA-lo-tot | 10.32               | 5.19  | 5.68            | 1.67  | 12.50 | -1.96 | 0.05  |
|                              | RA-up-R-% | 26.61               | 9.07  | 31.19           | 13.44 | 18.00 | 1.38  | 0.17  |
|                              | RA-up-L-% | 22.99               | 7.58  | 26.73           | 9.01  | 19.00 | 1.27  | 0.20  |
|                              | RA-lo-R-% | 18.73               | 7.96  | 17.03           | 5.45  | 31.00 | 0.00  | 1.00  |
|                              | RA-lo-L-% | 31.67               | 18.98 | 17.83           | 5.30  | 22.00 | -0.95 | 0.34  |
|                              | AsI-RA-up | 6.18                | 19.03 | 10.17           | 24.80 | 31.00 | 0.00  | 1.00  |
|                              | AsI-RA-lo | -17.69              | 40.54 | 2.74            | 25.31 | 26.00 | 0.53  | 0.60  |
|                              | AEO-R     | 6.71                | 5.16  | 3.46            | 2.30  | 7.00  | -2.54 | 0.01* |
|                              | AEO-L     | 5.24                | 4.22  | 5.35            | 2.83  | 29.00 | 0.21  | 0.83  |
|                              | AEO-tot   | 5.97                | 4.59  | 3.99            | 1.42  | 17.00 | -1.48 | 0.14  |
|                              | AEO-R-%   | 55.24               | 11.06 | 36.17           | 10.05 | 8.00  | -2.43 | 0.01* |
|                              | AEO-L-%   | 44.76               | 11.06 | 56.82           | 16.33 | 8.00  | 2.43  | 0.01* |
|                              | AsI-AEO   | 10.48               | 22.12 | -15.16          | 29.01 | 8.00  | -2.43 | 0.01* |
| <b>Standing<br/>Position</b> | BB-R      | 2.45                | 0.71  | 2.23            | 0.85  | 30.00 | -0.11 | 0.92  |
|                              | BB-L      | 1.77                | 0.98  | 1.14            | 0.37  | 17.50 | -1.43 | 0.15  |
|                              | BB-tot    | 2.11                | 0.62  | 1.65            | 0.57  | 23.00 | -0.85 | 0.40  |
|                              | BB-R-%    | 59.10               | 12.02 | 58.70           | 20.27 | 20.00 | 1.16  | 0.24  |
|                              | BB-L-%    | 40.90               | 12.02 | 32.20           | 11.63 | 20.00 | -1.16 | 0.24  |
|                              | AsI-BB    | 18.20               | 24.05 | 29.90           | 17.77 | 20.00 | 1.16  | 0.24  |
|                              | RA-up-R   | 8.72                | 6.10  | 7.07            | 3.51  | 28.00 | -0.32 | 0.75  |
|                              | RA-up-L   | 7.46                | 3.85  | 7.17            | 3.22  | 29.00 | 0.21  | 0.83  |
|                              | RA-lo-R   | 4.14                | 0.59  | 4.80            | 2.63  | 21.00 | 1.06  | 0.29  |
|                              | RA-lo-L   | 5.81                | 8.47  | 3.69            | 2.75  | 27.00 | -0.42 | 0.67  |
|                              | RA-up-tot | 12.44               | 7.92  | 10.54           | 5.16  | 29.00 | -0.21 | 0.83  |
|                              | RA-lo-tot | 7.05                | 4.58  | 6.62            | 3.91  | 27.00 | 0.42  | 0.67  |
|                              | RA-up-R-% | 32.73               | 11.05 | 27.25           | 8.41  | 25.00 | -0.64 | 0.53  |
|                              | RA-up-L-% | 29.52               | 7.00  | 28.50           | 8.70  | 29.00 | 0.21  | 0.83  |
|                              | RA-lo-R-% | 18.55               | 7.42  | 20.85           | 9.36  | 19.00 | 1.27  | 0.20  |
|                              | RA-lo-L-% | 19.20               | 15.99 | 15.20           | 6.22  | 29.00 | 0.21  | 0.83  |

|                                              |           |        |        |        |        |       |       |       |
|----------------------------------------------|-----------|--------|--------|--------|--------|-------|-------|-------|
| <b>Sitting<br/>Position</b>                  | ASI-RA-up | 3.71   | 15.15  | 2.05   | 13.31  | 27.00 | -0.42 | 0.67  |
|                                              | ASI-RA-lo | 6.00   | 32.53  | 16.68  | 16.75  | 29.00 | 0.21  | 0.83  |
|                                              | AEO-R     | 9.04   | 5.57   | 5.89   | 4.27   | 17.00 | -1.48 | 0.14  |
|                                              | AEO-L     | 7.59   | 3.95   | 5.82   | 2.79   | 22.50 | -0.90 | 0.37  |
|                                              | AEO-tot   | 8.31   | 4.54   | 5.81   | 2.65   | 19.00 | -1.27 | 0.20  |
|                                              | AEO-R-%   | 52.53  | 8.91   | 42.66  | 18.50  | 19.00 | -1.27 | 0.20  |
|                                              | AEO-L-%   | 47.47  | 8.91   | 47.40  | 19.90  | 19.00 | 1.27  | 0.20  |
|                                              | AsI-AEO   | 5.05   | 17.83  | -2.18  | 27.68  | 19.00 | -1.27 | 0.20  |
|                                              | BB-R      | 2.23   | 0.69   | 2.09   | 0.88   | 29.00 | 0.21  | 0.83  |
|                                              | BB-L      | 1.46   | 0.89   | 1.20   | 0.49   | 31.50 | -0.05 | 0.96  |
|                                              | BB-tot    | 1.84   | 0.56   | 1.62   | 0.63   | 31.00 | 0.00  | 1.00  |
|                                              | BB-R-%    | 61.52  | 13.33  | 57.27  | 20.88  | 30.00 | 0.11  | 0.92  |
|                                              | BB-L-%    | 38.48  | 13.33  | 32.82  | 12.62  | 30.00 | -0.11 | 0.92  |
|                                              | AsI-BB    | 23.04  | 26.65  | 27.03  | 17.71  | 30.00 | 0.11  | 0.92  |
|                                              | RA-up-P-R | 6.60   | 4.20   | 5.13   | 2.15   | 29.00 | -0.21 | 0.83  |
|                                              | RA-up-L   | 7.72   | 7.26   | 6.20   | 2.31   | 29.00 | 0.21  | 0.83  |
|                                              | RA-lo-R   | 3.73   | 1.16   | 2.93   | 0.81   | 21.00 | -1.06 | 0.29  |
|                                              | RA-lo-L   | 6.18   | 11.77  | 2.81   | 1.88   | 25.00 | -0.64 | 0.53  |
|                                              | RA-up-tot | 10.46  | 5.66   | 8.19   | 3.27   | 26.00 | -0.53 | 0.60  |
|                                              | RA-lo-tot | 6.81   | 6.40   | 4.32   | 0.75   | 25.00 | -0.64 | 0.53  |
|                                              | RA-up-R-% | 32.28  | 13.45  | 28.17  | 9.26   | 28.00 | -0.32 | 0.75  |
|                                              | RA-up-L-% | 30.79  | 5.43   | 33.33  | 8.92   | 15.00 | 1.69  | 0.09  |
|                                              | RA-lo-R-% | 19.38  | 8.05   | 17.91  | 9.16   | 29.00 | -0.21 | 0.83  |
|                                              | RA-lo-L-% | 17.56  | 13.23  | 14.31  | 4.79   | 29.00 | -0.21 | 0.83  |
|                                              | AsI-RA-up | -1.58  | 30.28  | -1.53  | 16.65  | 21.00 | -1.06 | 0.29  |
|                                              | AsI-RA-lo | 11.18  | 36.31  | 19.97  | 17.09  | 31.00 | 0.00  | 1.00  |
|                                              | AEO-R     | 3.14   | 0.73   | 2.40   | 1.01   | 17.50 | -1.43 | 0.15  |
|                                              | AEO-L     | 3.63   | 1.11   | 3.83   | 1.88   | 23.00 | 0.85  | 0.40  |
|                                              | AEO-tot   | 3.39   | 0.83   | 3.11   | 1.34   | 30.00 | -0.11 | 0.92  |
|                                              | AEO-R-%   | 46.86  | 6.42   | 35.16  | 14.22  | 19.00 | -1.27 | 0.20  |
|                                              | AEO-L-%   | 53.14  | 6.42   | 53.55  | 20.97  | 19.00 | 1.27  | 0.20  |
|                                              | AsI-AEO   | -6.28  | 12.83  | -17.19 | 18.06  | 19.00 | -1.27 | 0.20  |
| <b>Maximum<br/>Voluntary<br/>Contraction</b> | BB-R      | 477.53 | 359.67 | 825.12 | 471.41 | 11.00 | 2.12  | 0.03* |
|                                              | BB-L      | 618.89 | 390.92 | 858.94 | 384.31 | 15.00 | 1.69  | 0.09  |
|                                              | BB-tot    | 548.21 | 329.99 | 836.57 | 381.18 | 14.00 | 1.80  | 0.07  |
|                                              | BB-R-%    | 41.85  | 12.78  | 43.23  | 17.80  | 21.00 | 1.06  | 0.29  |
|                                              | BB-L-%    | 58.15  | 12.78  | 47.21  | 18.98  | 21.00 | -1.06 | 0.29  |
|                                              | AsI-BB    | -16.31 | 25.56  | -1.04  | 26.82  | 21.00 | 1.06  | 0.29  |
|                                              | RA-up-R   | 97.55  | 78.76  | 126.78 | 66.40  | 23.00 | 0.85  | 0.40  |
|                                              | RA-up-L   | 109.19 | 80.82  | 136.47 | 90.76  | 22.00 | 0.95  | 0.34  |
|                                              | RA-lo-R   | 69.26  | 72.09  | 131.72 | 95.12  | 18.00 | 1.38  | 0.17  |
|                                              | RA-lo-L   | 300.63 | 601.07 | 150.06 | 73.42  | 18.00 | 1.38  | 0.17  |
|                                              | RA-up-tot | 152.14 | 117.79 | 194.79 | 106.93 | 23.00 | 0.85  | 0.40  |
|                                              | RA-lo-tot | 219.57 | 315.55 | 206.68 | 126.19 | 23.00 | 0.85  | 0.40  |
|                                              | RA-up-R-% | 26.52  | 12.06  | 22.89  | 7.23   | 27.00 | -0.42 | 0.67  |
|                                              | RA-up-L-% | 28.36  | 11.14  | 24.07  | 9.94   | 24.00 | -0.74 | 0.46  |
|                                              | RA-lo-R-% | 17.09  | 7.28   | 20.41  | 10.83  | 23.00 | 0.85  | 0.40  |
|                                              | RA-lo-L-% | 28.03  | 26.27  | 24.04  | 7.33   | 21.00 | 1.06  | 0.29  |

|                     |        |        |        |        |       |       |       |
|---------------------|--------|--------|--------|--------|-------|-------|-------|
| AsI-RA-up           | -6.91  | 13.62  | 0.89   | 14.20  | 23.00 | 0.85  | 0.40  |
| AsI-RA-lo           | -8.92  | 37.90  | -6.21  | 21.45  | 27.00 | -0.42 | 0.67  |
| AEO-R               | 65.49  | 71.55  | 111.93 | 127.79 | 22.00 | 0.95  | 0.34  |
| AEO-L               | 87.22  | 114.21 | 162.56 | 89.60  | 18.00 | 1.38  | 0.17  |
| AEO-tot             | 76.35  | 92.78  | 136.96 | 96.70  | 18.00 | 1.38  | 0.17  |
| AEO-R-%             | 46.62  | 5.27   | 36.43  | 17.48  | 25.00 | -0.64 | 0.53  |
| AEO-L-%             | 53.38  | 5.27   | 53.51  | 22.40  | 25.00 | 0.64  | 0.53  |
| AsI-AEO             | -6.76  | 10.54  | -14.63 | 30.82  | 25.00 | -0.64 | 0.53  |
|                     | 127.63 | 107.12 | 260.56 | 141.83 | 9.00  | 2.33  | 0.02* |
| <b>FCoI-BB-R</b>    |        |        |        |        |       |       |       |
|                     | 321.70 | 337.60 | 404.66 | 146.74 | 15.00 | 1.69  | 0.09  |
| <b>FCoI-BB-L</b>    |        |        |        |        |       |       |       |
|                     | 15.24  | 14.80  | 22.04  | 15.58  | 18.00 | 1.38  | 0.17  |
| <b>FCoI-RA-up-R</b> |        |        |        |        |       |       |       |
|                     | 19.83  | 18.39  | 26.96  | 19.54  | 16.00 | 1.59  | 0.11  |
| <b>FCoI-RA-up-L</b> |        |        |        |        |       |       |       |
|                     | 18.06  | 26.95  | 42.40  | 31.61  | 12.00 | 2.01  | 0.04* |
| <b>FCoI-RA-lo-R</b> |        |        |        |        |       |       |       |
|                     | 83.55  | 164.86 | 60.46  | 50.35  | 14.00 | 1.80  | 0.07  |
| <b>FCoI-RA-lo-L</b> |        |        |        |        |       |       |       |
|                     | 14.77  | 17.92  | 39.21  | 41.32  | 13.00 | 1.91  | 0.06  |
| <b>FCoI-AEO-R</b>   |        |        |        |        |       |       |       |
|                     | 28.13  | 43.03  | 40.94  | 24.59  | 19.00 | 1.27  | 0.20  |
| <b>FCoI-AEO-L</b>   |        |        |        |        |       |       |       |
|                     | -32.27 | 36.44  | -11.79 | 35.85  | 22.00 | 0.95  | 0.34  |
| <b>FCoSI-BB</b>     |        |        |        |        |       |       |       |
|                     | -13.02 | 19.41  | -6.60  | 25.22  | 27.00 | 0.42  | 0.67  |
| <b>FCoSI-RA-up</b>  |        |        |        |        |       |       |       |
|                     | 9.19   | 57.75  | -2.12  | 34.13  | 23.00 | -0.85 | 0.40  |
| <b>FCoSI-RA-lo</b>  |        |        |        |        |       |       |       |
|                     | -16.18 | 28.00  | 8.97   | 39.04  | 18.00 | 1.38  | 0.17  |
| <b>FCoSI-AEO</b>    |        |        |        |        |       |       |       |

AcI— activity index; AEO— abdominal external oblique muscle; AsI— asymmetry index; BB — biceps brachii muscle; ES—effect size; FCAI— Functional Clenching Activity Index; FCI — Functional Clenching Index; FCoI— Functional Contraction Index; FCoSI— Functional Contraction Symmetry Index; FCSI— Functional Clenching Symmetry Index; L — left side; MM — the superficial part of the masseter muscle; MVC— maximum voluntary contraction; n— individuals in the sample; POC— percentage overlapping coefficient; R— right side; RA-lo — the lower part of the rectus abdominis muscle; RA-up— the upper part of the rectus abdominis muscle; SCM — the middle part of the sternocleidomastoid muscle; SD — standard deviation; TA — the anterior part of the temporalis muscle; TC— torque coefficient; U— the difference between the two rank totals; UT— the upper part of the trapezius muscle; Z— the Mann-Whitney U test; \* significant difference.

**Table S8.** Comparison of bioelectrical activity findings of postural muscles and the arm muscles in emmetropic subjects and myopic subjects (Accommodation Paralysis in The Right Eye).

|                              |           | Emmetropic Subjects |       | Myopic Subjects |       | U     | Z     | P    |
|------------------------------|-----------|---------------------|-------|-----------------|-------|-------|-------|------|
|                              |           | Mean                | SD    | Mean            | SD    |       |       |      |
| <b>Lying<br/>Position</b>    | BB-R      | 3.80                | 1.36  | 3.68            | 2.02  | 28.50 | -0.26 | 0.79 |
|                              | BB-L      | 4.45                | 5.01  | 3.52            | 4.23  | 30.00 | 0.11  | 0.92 |
|                              | BB-tot    | 4.12                | 2.97  | 3.56            | 2.95  | 30.00 | -0.11 | 0.92 |
|                              | BB-R-%    | 57.18               | 19.50 | 52.49           | 18.34 | 28.00 | -0.32 | 0.75 |
|                              | BB-L-%    | 42.82               | 19.50 | 39.98           | 15.96 | 28.00 | 0.32  | 0.75 |
|                              | AsI-BB    | 14.35               | 39.00 | 16.13           | 27.50 | 28.00 | -0.32 | 0.75 |
|                              | RA-UP-R   | 10.04               | 7.81  | 6.12            | 2.85  | 29.00 | -0.21 | 0.83 |
|                              | RA-UP-L   | 7.25                | 4.86  | 6.22            | 3.45  | 31.00 | 0.00  | 1.00 |
|                              | RA-lo-R   | 4.89                | 3.60  | 3.44            | 1.77  | 29.00 | -0.21 | 0.83 |
|                              | RA-lo-L   | 8.37                | 8.21  | 2.93            | 1.25  | 16.00 | -1.59 | 0.11 |
|                              | RA-up-tot | 13.67               | 9.57  | 9.09            | 3.29  | 31.00 | 0.00  | 1.00 |
|                              | RA-lo-tot | 9.08                | 6.69  | 4.85            | 2.04  | 23.00 | -0.85 | 0.40 |
|                              | RA-up-R-% | 31.98               | 16.25 | 30.41           | 12.62 | 28.00 | 0.32  | 0.75 |
|                              | RA-up-L-% | 24.53               | 9.01  | 30.26           | 14.05 | 18.00 | 1.38  | 0.17 |
|                              | RA-lo-R-% | 17.23               | 9.11  | 17.21           | 7.74  | 24.00 | 0.74  | 0.46 |
|                              | RA-lo-L-% | 26.26               | 17.90 | 13.77           | 7.15  | 19.00 | -1.27 | 0.20 |
|                              | AsI-RA-up | 9.01                | 24.74 | 2.69            | 30.14 | 24.00 | -0.74 | 0.46 |
|                              | AsI-RA-lo | -14.28              | 31.82 | 14.31           | 23.15 | 15.00 | 1.69  | 0.09 |
|                              | AEO-R     | 7.26                | 11.07 | 3.33            | 1.30  | 26.00 | -0.53 | 0.60 |
|                              | AEO-L     | 3.90                | 1.22  | 3.75            | 1.45  | 31.00 | 0.00  | 1.00 |
|                              | AEO-tot   | 5.58                | 5.82  | 3.40            | 1.51  | 27.00 | -0.42 | 0.67 |
|                              | AEO-R-%   | 53.06               | 15.34 | 42.87           | 14.53 | 24.00 | -0.74 | 0.46 |
|                              | AEO-L-%   | 46.94               | 15.34 | 47.93           | 14.08 | 24.00 | 0.74  | 0.46 |
|                              | AsI-AEO   | 6.12                | 30.68 | -0.64           | 16.86 | 24.00 | -0.74 | 0.46 |
| <b>Standing<br/>Position</b> | BB-R      | 2.29                | 0.52  | 2.21            | 0.67  | 27.00 | 0.42  | 0.67 |
|                              | BB-L      | 2.00                | 1.55  | 1.24            | 0.53  | 23.00 | -0.85 | 0.40 |
|                              | BB-tot    | 2.14                | 0.70  | 1.72            | 0.55  | 28.50 | -0.26 | 0.79 |
|                              | BB-R-%    | 57.28               | 16.04 | 58.70           | 16.83 | 25.00 | 0.64  | 0.53 |
|                              | BB-L-%    | 42.72               | 16.04 | 32.79           | 10.73 | 25.00 | -0.64 | 0.53 |
|                              | AsI-BB    | 14.57               | 32.09 | 27.06           | 13.50 | 25.00 | 0.64  | 0.53 |
|                              | RA-up-R   | 7.92                | 4.06  | 5.83            | 2.42  | 24.00 | -0.74 | 0.46 |
|                              | RA-up-L   | 6.90                | 2.61  | 6.40            | 2.88  | 30.00 | 0.11  | 0.92 |
|                              | RA-lo-R   | 4.23                | 0.99  | 4.30            | 1.90  | 31.00 | 0.00  | 1.00 |
|                              | RA-lo-L   | 5.16                | 3.81  | 3.20            | 2.58  | 13.00 | -1.91 | 0.06 |
|                              | RA-up-tot | 11.37               | 5.00  | 9.04            | 3.83  | 25.00 | -0.64 | 0.53 |
|                              | RA-lo-tot | 6.81                | 2.51  | 5.89            | 3.01  | 24.00 | -0.74 | 0.46 |
|                              | RA-up-R-% | 31.74               | 10.63 | 27.34           | 8.57  | 29.00 | 0.21  | 0.83 |
|                              | RA-up-L-% | 28.75               | 7.99  | 29.91           | 9.91  | 20.00 | 1.16  | 0.24 |
|                              | RA-lo-R-% | 18.38               | 5.66  | 20.85           | 7.96  | 19.00 | 1.27  | 0.20 |
|                              | RA-lo-L-% | 21.13               | 12.50 | 13.48           | 5.94  | 23.00 | -0.85 | 0.40 |
|                              | AsI-RA-up | 4.12                | 17.55 | -2.21           | 8.42  | 19.00 | -1.27 | 0.20 |
|                              | AsI-RA-lo | -1.04               | 25.19 | 21.07           | 18.92 | 14.00 | 1.80  | 0.07 |

|                                              |           |        |        |        |        |       |       |       |
|----------------------------------------------|-----------|--------|--------|--------|--------|-------|-------|-------|
| <b>Sitting<br/>Position</b>                  | AEO-R     | 9.46   | 6.28   | 5.34   | 2.94   | 18.00 | -1.38 | 0.17  |
|                                              | AEO-L     | 8.79   | 6.63   | 5.29   | 3.32   | 19.00 | -1.27 | 0.20  |
|                                              | AEO-tot   | 9.12   | 6.27   | 5.20   | 2.66   | 17.00 | -1.48 | 0.14  |
|                                              | AEO-R-%   | 51.95  | 8.34   | 45.24  | 15.71  | 19.00 | -1.27 | 0.20  |
|                                              | AEO-L-%   | 48.05  | 8.34   | 47.06  | 15.82  | 19.00 | 1.27  | 0.20  |
|                                              | AsI-AEO   | 3.91   | 16.68  | 1.82   | 25.08  | 19.00 | -1.27 | 0.20  |
|                                              | BB-R      | 2.21   | 0.70   | 2.09   | 0.71   | 31.00 | 0.00  | 1.00  |
|                                              | BB-L      | 1.87   | 0.98   | 1.32   | 0.86   | 21.00 | -1.06 | 0.29  |
|                                              | BB-tot    | 2.04   | 0.47   | 1.69   | 0.69   | 22.50 | -0.90 | 0.37  |
|                                              | BB-R-%    | 55.73  | 16.40  | 57.31  | 17.47  | 22.00 | 0.95  | 0.34  |
|                                              | BB-L-%    | 44.27  | 16.40  | 34.38  | 12.88  | 22.00 | -0.95 | 0.34  |
|                                              | AsI-BB    | 11.46  | 32.79  | 24.11  | 19.00  | 22.00 | 0.95  | 0.34  |
|                                              | RA-up-P-R | 7.30   | 3.65   | 5.17   | 2.07   | 23.00 | -0.85 | 0.40  |
|                                              | RA-up-L   | 7.04   | 4.80   | 6.90   | 4.22   | 28.00 | 0.32  | 0.75  |
|                                              | RA-lo-R   | 4.76   | 3.99   | 3.00   | 1.22   | 30.50 | -0.05 | 0.96  |
|                                              | RA-lo-L   | 5.58   | 6.88   | 2.26   | 0.51   | 31.00 | 0.00  | 1.00  |
|                                              | RA-up-tot | 10.82  | 5.97   | 8.62   | 3.81   | 31.00 | 0.00  | 1.00  |
|                                              | RA-lo-tot | 7.55   | 6.83   | 4.00   | 1.66   | 27.00 | -0.42 | 0.67  |
|                                              | RA-up-R-% | 32.22  | 11.07  | 27.32  | 9.02   | 19.00 | -1.27 | 0.20  |
|                                              | RA-up-L-% | 29.24  | 10.50  | 34.54  | 14.61  | 16.00 | 1.59  | 0.11  |
|                                              | RA-lo-R-% | 19.08  | 8.43   | 17.59  | 8.08   | 31.00 | 0.00  | 1.00  |
|                                              | RA-lo-L-% | 19.47  | 15.28  | 12.07  | 5.03   | 28.00 | -0.32 | 0.75  |
|                                              | ASI-RA-up | 4.78   | 12.06  | -7.29  | 18.22  | 13.00 | -1.91 | 0.06  |
|                                              | ASI-RA-lo | 7.81   | 28.43  | 17.04  | 10.02  | 25.00 | 0.64  | 0.53  |
|                                              | AEO-R     | 38.72  | 107.36 | 2.65   | 0.94   | 31.00 | 0.00  | 1.00  |
|                                              | AEO-L     | 3.58   | 1.20   | 4.27   | 2.59   | 24.00 | 0.74  | 0.46  |
|                                              | AEO-tot   | 21.15  | 53.87  | 3.45   | 1.70   | 29.00 | 0.21  | 0.83  |
|                                              | AEO-R-%   | 52.13  | 18.03  | 37.05  | 11.13  | 12.00 | -2.01 | 0.04* |
|                                              | AEO-L-%   | 47.87  | 18.03  | 54.85  | 15.04  | 12.00 | 2.01  | 0.04* |
|                                              | AsI-AEO   | 4.27   | 36.06  | -14.70 | 18.17  | 12.00 | -2.01 | 0.04* |
| <b>Maximum<br/>Voluntary<br/>Contraction</b> | BB-R      | 558.33 | 351.20 | 683.55 | 341.43 | 23.00 | 0.85  | 0.40  |
|                                              | BB-L      | 695.78 | 357.44 | 805.66 | 390.91 | 22.00 | 0.95  | 0.34  |
|                                              | BB-tot    | 627.06 | 297.76 | 738.77 | 313.15 | 24.00 | 0.74  | 0.46  |
|                                              | BB-R-%    | 43.45  | 13.26  | 41.27  | 15.54  | 31.00 | 0.00  | 1.00  |
|                                              | BB-L-%    | 56.55  | 13.26  | 50.83  | 17.81  | 31.00 | 0.00  | 1.00  |
|                                              | AsI-BB    | -13.11 | 26.51  | -6.06  | 27.98  | 31.00 | 0.00  | 1.00  |
|                                              | RA-up-R   | 88.09  | 60.46  | 92.34  | 46.92  | 25.00 | 0.64  | 0.53  |
|                                              | RA-up-L   | 97.88  | 60.37  | 114.70 | 77.57  | 28.00 | 0.32  | 0.75  |
|                                              | RA-lo-R   | 68.36  | 63.25  | 109.39 | 74.80  | 20.00 | 1.16  | 0.24  |
|                                              | RA-lo-L   | 94.86  | 147.01 | 105.75 | 61.83  | 13.00 | 1.91  | 0.06  |
|                                              | RA-up-tot | 137.03 | 88.76  | 149.09 | 71.81  | 26.00 | 0.53  | 0.60  |
|                                              | RA-lo-tot | 115.79 | 135.53 | 161.56 | 100.98 | 18.00 | 1.38  | 0.17  |
|                                              | RA-up-R-% | 28.45  | 7.24   | 20.97  | 8.07   | 17.00 | -1.48 | 0.14  |
|                                              | RA-up-L-% | 30.28  | 8.60   | 25.00  | 12.35  | 26.00 | -0.53 | 0.60  |
|                                              | RA-lo-R-% | 19.64  | 4.53   | 22.49  | 9.52   | 23.00 | 0.85  | 0.40  |
|                                              | RA-lo-L-% | 21.64  | 8.55   | 23.46  | 9.10   | 15.00 | 1.69  | 0.09  |
|                                              | AsI-RA-up | -2.67  | 19.11  | -3.12  | 22.89  | 30.00 | 0.11  | 0.92  |
|                                              | AsI-RA-lo | -3.16  | 14.82  | -1.03  | 21.92  | 29.00 | -0.21 | 0.83  |

|  |                     |        |        |        |        |       |       |       |
|--|---------------------|--------|--------|--------|--------|-------|-------|-------|
|  | AEO-R               | 55.77  | 42.90  | 98.39  | 107.79 | 25.00 | 0.64  | 0.53  |
|  | AEO-L               | 70.19  | 48.61  | 110.64 | 91.08  | 24.50 | 0.69  | 0.49  |
|  | AEO-tot             | 62.98  | 45.51  | 103.01 | 97.40  | 25.00 | 0.64  | 0.53  |
|  | AEO-R-%             | 43.00  | 4.49   | 39.49  | 11.83  | 30.00 | 0.11  | 0.92  |
|  | AEO-L-%             | 57.00  | 4.49   | 52.99  | 14.61  | 30.00 | -0.11 | 0.92  |
|  | AsI-AEO             | -14.00 | 8.98   | -9.03  | 22.41  | 30.00 | 0.11  | 0.92  |
|  | <b>FCoI-BB-R</b>    | 157.82 | 126.51 | 218.48 | 155.73 | 20.00 | 1.16  | 0.24  |
|  |                     | 360.44 | 334.80 | 351.88 | 219.27 | 27.00 | 0.42  | 0.67  |
|  | <b>FCoI-BB-L</b>    | 16.30  | 20.08  | 14.87  | 5.37   | 22.00 | 0.95  | 0.34  |
|  | <b>FCoI-RA-up-R</b> | 17.95  | 16.80  | 20.35  | 14.61  | 30.00 | 0.11  | 0.92  |
|  | <b>FCoI-RA-up-L</b> | 22.12  | 28.35  | 32.12  | 23.30  | 22.00 | 0.95  | 0.34  |
|  | <b>FCoI-RA-lo-R</b> | 35.50  | 84.69  | 47.09  | 33.40  | 11.00 | 2.12  | 0.03* |
|  | <b>FCoI-RA-lo-L</b> | 13.15  | 11.52  | 33.29  | 40.94  | 19.00 | 1.27  | 0.20  |
|  | <b>FCoI-AEO-R</b>   | 18.96  | 12.87  | 35.63  | 34.82  | 27.00 | 0.42  | 0.67  |
|  | <b>FCoI-AEO-L</b>   | -27.06 | 31.60  | -15.98 | 33.77  | 27.00 | 0.42  | 0.67  |
|  | <b>FCoSI-BB</b>     | -11.80 | 24.82  | -1.61  | 30.77  | 28.00 | 0.32  | 0.75  |
|  | <b>FCoSI-RA-up</b>  | 11.36  | 37.49  | -9.92  | 32.49  | 18.00 | -1.38 | 0.17  |
|  | <b>FCoSI-RA-lo</b>  | -18.90 | 29.90  | -3.15  | 29.13  | 27.00 | 0.42  | 0.67  |
|  | <b>FCoSI-AEO</b>    |        |        |        |        |       |       |       |

AcI— activity index; AEO— abdominal external oblique muscle; AsI— asymmetry index; BB — biceps brachii muscle; ES—effect size; FCAI— Functional Clenching Activity Index; FCI — Functional Clenching Index; FCoI— Functional Contraction Index; FCoSI— Functional Contraction Symmetry Index; FCSI— Functional Clenching Symmetry Index; L— left side; MM — the superficial part of the masseter muscle; MVC— maximum voluntary contraction; n— individuals in the sample; POC— percentage overlapping coefficient; R— right side; RA-lo — the lower part of the rectus abdominis muscle; RA-up— the upper part of the rectus abdominis muscle; SCM — the middle part of the sternocleidomastoid muscle; SD — standard deviation; TA — the anterior part of the temporalis muscle; TC— torque coefficient; U— the difference between the two rank totals; UT— the upper part of the trapezius muscle; Z— the Mann-Whitney U test; \* significant difference.

**Table S9.** Comparison of bioelectrical activity findings of postural muscles and the arm muscles in emmetropic subjects and myopic subjects (Accommodation Paralysis in The Left Eye).

|                              |           | Emmetropic Subjects |       | Myopic Subjects |       | U     | Z     | P     |
|------------------------------|-----------|---------------------|-------|-----------------|-------|-------|-------|-------|
|                              |           | Mean                | SD    | Mean            | SD    |       |       |       |
| <b>Lying<br/>Position</b>    | BB-R      | 4.99                | 4.45  | 2.87            | 1.14  | 21.00 | -1.06 | 0.29  |
|                              | BB-L      | 3.75                | 3.77  | 2.21            | 1.18  | 29.00 | -0.21 | 0.83  |
|                              | BB-tot    | 4.37                | 3.58  | 2.52            | 0.90  | 21.00 | -1.06 | 0.29  |
|                              | BB-R-%    | 61.92               | 15.81 | 56.10           | 16.61 | 25.00 | -0.64 | 0.53  |
|                              | BB-L-%    | 38.08               | 15.81 | 35.69           | 10.32 | 25.00 | 0.64  | 0.53  |
|                              | AsI-BB    | 23.85               | 31.62 | 23.56           | 13.22 | 25.00 | -0.64 | 0.53  |
|                              | RA-up-R   | 10.70               | 8.36  | 5.76            | 2.89  | 22.00 | -0.95 | 0.34  |
|                              | RA-up-L   | 12.90               | 12.52 | 5.72            | 2.85  | 27.00 | -0.42 | 0.67  |
|                              | RA-lo-R   | 5.47                | 3.94  | 4.52            | 4.29  | 28.00 | -0.32 | 0.75  |
|                              | RA-lo-L   | 7.53                | 9.08  | 2.73            | 1.58  | 21.00 | -1.06 | 0.29  |
|                              | RA-up-tot | 17.15               | 14.41 | 8.46            | 3.46  | 21.00 | -1.06 | 0.29  |
|                              | RA-lo-tot | 9.24                | 7.64  | 5.84            | 4.74  | 26.00 | -0.53 | 0.60  |
|                              | RA-up-R-% | 30.01               | 6.52  | 29.55           | 12.94 | 26.00 | 0.53  | 0.60  |
|                              | RA-up-L-% | 33.36               | 13.79 | 29.08           | 12.38 | 28.00 | -0.32 | 0.75  |
|                              | RA-lo-R-% | 17.70               | 10.10 | 20.69           | 12.67 | 22.00 | 0.95  | 0.34  |
|                              | RA-lo-L-% | 18.92               | 11.83 | 13.38           | 4.71  | 25.00 | -0.64 | 0.53  |
|                              | AsI-RA-up | -1.55               | 18.48 | 4.43            | 28.18 | 31.00 | 0.00  | 1.00  |
|                              | AsI-RA-lo | -1.52               | 34.61 | 19.25           | 21.37 | 22.00 | 0.95  | 0.34  |
|                              | AEO-R     | 6.79                | 8.96  | 3.29            | 1.85  | 24.00 | -0.74 | 0.46  |
|                              | AEO-L     | 7.54                | 11.06 | 3.48            | 1.76  | 26.50 | -0.48 | 0.63  |
|                              | AEO-tot   | 7.17                | 6.68  | 3.40            | 1.76  | 22.00 | -0.95 | 0.34  |
|                              | AEO-R-%   | 49.90               | 21.95 | 44.29           | 12.87 | 27.00 | -0.42 | 0.67  |
|                              | AEO-L-%   | 50.10               | 21.95 | 46.79           | 13.99 | 27.00 | 0.42  | 0.67  |
|                              | AsI-AEO   | -0.21               | 43.90 | -0.45           | 11.53 | 27.00 | -0.42 | 0.67  |
| <b>Standing<br/>Position</b> | BB-R      | 2.59                | 1.22  | 2.46            | 1.58  | 31.00 | 0.00  | 1.00  |
|                              | BB-L      | 1.55                | 0.56  | 2.14            | 3.01  | 23.00 | -0.85 | 0.40  |
|                              | BB-tot    | 2.07                | 0.58  | 2.29            | 2.27  | 19.00 | -1.27 | 0.20  |
|                              | BB-R-%    | 61.28               | 13.58 | 55.33           | 18.72 | 29.00 | 0.21  | 0.83  |
|                              | BB-L-%    | 38.72               | 13.58 | 35.61           | 14.47 | 29.00 | -0.21 | 0.83  |
|                              | AsI-BB    | 22.55               | 27.17 | 20.65           | 21.01 | 29.00 | 0.21  | 0.83  |
|                              | RA-up-R   | 8.25                | 5.25  | 6.40            | 2.72  | 30.00 | 0.11  | 0.92  |
|                              | RA-up-L   | 8.88                | 5.00  | 6.70            | 2.79  | 29.00 | -0.21 | 0.83  |
|                              | RA-lo-R   | 3.90                | 0.78  | 6.69            | 4.07  | 13.00 | 1.91  | 0.06  |
|                              | RA-lo-L   | 3.05                | 1.06  | 5.05            | 3.54  | 25.00 | 0.64  | 0.53  |
|                              | RA-up-tot | 12.70               | 6.79  | 9.75            | 4.06  | 29.00 | -0.21 | 0.83  |
|                              | RA-lo-tot | 5.42                | 1.10  | 9.19            | 5.30  | 17.00 | 1.48  | 0.14  |
|                              | RA-up-R-% | 32.76               | 10.20 | 24.47           | 8.80  | 18.00 | -1.38 | 0.17  |
|                              | RA-up-L-% | 35.57               | 12.23 | 25.30           | 9.02  | 18.00 | -1.38 | 0.17  |
|                              | RA-lo-R-% | 17.60               | 5.29  | 24.70           | 10.87 | 11.00 | 2.12  | 0.03* |
|                              | RA-lo-L-% | 14.06               | 6.63  | 17.08           | 9.44  | 22.00 | 0.95  | 0.34  |
|                              | AsI-RA-up | -3.07               | 27.60 | -0.16           | 8.42  | 19.00 | -1.27 | 0.20  |
|                              | AsI-RA-lo | 13.52               | 15.44 | 19.95           | 22.72 | 24.00 | 0.74  | 0.46  |



|                                              |           |        |        |         |         |       |       |      |
|----------------------------------------------|-----------|--------|--------|---------|---------|-------|-------|------|
| <b>Sitting<br/>Position</b>                  | AEO-R     | 8.92   | 5.61   | 5.31    | 2.12    | 20.00 | -1.16 | 0.24 |
|                                              | AEO-L     | 7.62   | 4.48   | 5.41    | 2.37    | 21.00 | -1.06 | 0.29 |
|                                              | AEO-tot   | 8.27   | 4.70   | 5.30    | 1.88    | 21.00 | -1.06 | 0.29 |
|                                              | AEO-R-%   | 52.48  | 10.24  | 45.69   | 15.24   | 27.00 | -0.42 | 0.67 |
|                                              | AEO-L-%   | 47.52  | 10.24  | 45.75   | 15.22   | 27.00 | 0.42  | 0.67 |
|                                              | AsI-AEO   | 4.96   | 20.47  | 3.09    | 20.52   | 27.00 | -0.42 | 0.67 |
|                                              | BB-R      | 2.39   | 0.66   | 1.95    | 0.68    | 23.50 | -0.79 | 0.43 |
|                                              | BB-L      | 1.61   | 0.61   | 1.32    | 0.55    | 27.00 | -0.42 | 0.67 |
|                                              | BB-tot    | 2.00   | 0.46   | 1.63    | 0.54    | 20.00 | -1.16 | 0.24 |
|                                              | BB-R-%    | 60.14  | 10.35  | 55.61   | 17.18   | 31.00 | 0.00  | 1.00 |
|                                              | BB-L-%    | 39.86  | 10.35  | 35.69   | 11.95   | 31.00 | 0.00  | 1.00 |
|                                              | AsI-BB    | 20.27  | 20.69  | 21.72   | 15.24   | 31.00 | 0.00  | 1.00 |
|                                              | RA-up-P-R | 6.90   | 3.06   | 5.29    | 2.43    | 25.00 | -0.64 | 0.53 |
|                                              | RA-up-L   | 6.10   | 5.35   | 8.70    | 8.87    | 21.00 | 1.06  | 0.29 |
|                                              | RA-lo-R   | 3.71   | 1.60   | 3.42    | 1.97    | 31.00 | 0.00  | 1.00 |
|                                              | RA-lo-L   | 5.44   | 7.25   | 1.92    | 1.01    | 27.00 | -0.42 | 0.67 |
|                                              | RA-up-tot | 9.96   | 5.41   | 9.60    | 5.33    | 27.00 | 0.42  | 0.67 |
|                                              | RA-lo-tot | 6.43   | 5.07   | 4.41    | 2.38    | 30.00 | -0.11 | 0.92 |
|                                              | RA-up-R-% | 32.80  | 8.42   | 27.42   | 12.76   | 26.00 | -0.53 | 0.60 |
|                                              | RA-up-L-% | 28.44  | 16.50  | 35.44   | 18.35   | 24.00 | 0.74  | 0.46 |
|                                              | RA-lo-R-% | 17.66  | 4.71   | 18.84   | 10.53   | 29.00 | 0.21  | 0.83 |
|                                              | RA-lo-L-% | 21.10  | 20.21  | 10.40   | 4.38    | 24.00 | -0.74 | 0.46 |
|                                              | AsI-RA-up | 16.67  | 35.72  | -6.44   | 30.53   | 18.00 | -1.38 | 0.17 |
|                                              | AsI-RA-lo | 6.89   | 34.76  | 24.58   | 15.97   | 23.00 | 0.85  | 0.40 |
| <b>Maximum<br/>Voluntary<br/>Contraction</b> | AEO-R     | 2.67   | 0.56   | 2.74    | 0.98    | 23.50 | 0.79  | 0.43 |
|                                              | AEO-L     | 3.48   | 0.95   | 3.95    | 1.52    | 23.00 | 0.85  | 0.40 |
|                                              | AEO-tot   | 3.07   | 0.70   | 3.34    | 1.18    | 25.00 | 0.64  | 0.53 |
|                                              | AEO-R-%   | 43.79  | 4.83   | 38.75   | 12.11   | 30.00 | 0.11  | 0.92 |
|                                              | AEO-L-%   | 56.21  | 4.83   | 52.02   | 15.66   | 30.00 | -0.11 | 0.92 |
|                                              | AsI-AEO   | -12.42 | 9.66   | -10.51  | 14.91   | 30.00 | 0.11  | 0.92 |
|                                              | BB-R      | 662.72 | 399.49 | 834.93  | 348.90  | 19.00 | 1.27  | 0.20 |
|                                              | BB-L      | 776.61 | 417.01 | 1355.43 | 1546.21 | 21.00 | 1.06  | 0.29 |
|                                              | BB-tot    | 719.67 | 364.53 | 1088.55 | 794.15  | 18.00 | 1.38  | 0.17 |
|                                              | BB-R-%    | 45.34  | 11.75  | 41.60   | 18.45   | 28.00 | 0.32  | 0.75 |
|                                              | BB-L-%    | 54.66  | 11.75  | 50.07   | 19.98   | 28.00 | -0.32 | 0.75 |
|                                              | AsI-BB    | -9.32  | 23.50  | -4.68   | 33.05   | 28.00 | 0.32  | 0.75 |
|                                              | RA-up-R   | 91.94  | 51.88  | 116.75  | 63.47   | 19.00 | 1.27  | 0.20 |
|                                              | RA-up-L   | 110.13 | 73.91  | 126.57  | 49.71   | 24.00 | 0.74  | 0.46 |
|                                              | RA-lo-R   | 77.37  | 84.26  | 156.22  | 121.83  | 17.00 | 1.48  | 0.14 |
|                                              | RA-lo-L   | 107.68 | 182.27 | 139.09  | 98.93   | 13.00 | 1.91  | 0.06 |
|                                              | RA-up-tot | 147.00 | 87.08  | 178.30  | 86.65   | 20.00 | 1.16  | 0.24 |
|                                              | RA-lo-tot | 131.21 | 174.84 | 225.17  | 169.88  | 16.00 | 1.59  | 0.11 |
|                                              | RA-up-R-% | 28.35  | 8.90   | 21.24   | 6.99    | 18.00 | -1.38 | 0.17 |
|                                              | RA-up-L-% | 31.68  | 7.95   | 24.36   | 8.53    | 21.00 | -1.06 | 0.29 |
|                                              | RA-lo-R-% | 19.44  | 4.20   | 23.62   | 9.07    | 17.00 | 1.48  | 0.14 |
|                                              | RA-lo-L-% | 20.52  | 10.21  | 23.16   | 8.19    | 16.00 | 1.59  | 0.11 |
|                                              | AsI-RA-up | -6.37  | 18.05  | -1.44   | 16.33   | 29.00 | 0.21  | 0.83 |
|                                              | AsI-RA-lo | 0.51   | 15.72  | 3.17    | 19.44   | 30.00 | -0.11 | 0.92 |

|  |                     |        |        |        |        |       |       |       |
|--|---------------------|--------|--------|--------|--------|-------|-------|-------|
|  | AEO-R               | 79.87  | 76.96  | 123.96 | 114.30 | 23.00 | 0.85  | 0.40  |
|  | AEO-L               | 131.52 | 205.10 | 134.00 | 83.44  | 21.00 | 1.06  | 0.29  |
|  | AEO-tot             | 105.70 | 138.76 | 128.73 | 92.82  | 22.00 | 0.95  | 0.34  |
|  | AEO-R-%             | 45.44  | 9.78   | 40.92  | 16.30  | 31.00 | 0.00  | 1.00  |
|  | AEO-L-%             | 54.56  | 9.78   | 49.88  | 18.18  | 31.00 | 0.00  | 1.00  |
|  | AsI-AEO             | -9.13  | 19.56  | -5.81  | 25.31  | 31.00 | 0.00  | 1.00  |
|  |                     | 181.54 | 148.94 | 305.95 | 153.26 | 14.00 | 1.80  | 0.07  |
|  | <b>FCoI-BB-R</b>    |        |        |        |        |       |       |       |
|  |                     | 418.28 | 425.19 | 796.52 | 945.94 | 15.00 | 1.69  | 0.09  |
|  | <b>FCoI-BB-L</b>    |        |        |        |        |       |       |       |
|  |                     | 13.77  | 14.35  | 20.31  | 13.37  | 14.00 | 1.80  | 0.07  |
|  | <b>FCoI-RA-up-R</b> |        |        |        |        |       |       |       |
|  |                     | 17.53  | 19.71  | 25.24  | 13.86  | 18.00 | 1.38  | 0.17  |
|  | <b>FCoI-RA-up-L</b> |        |        |        |        |       |       |       |
|  |                     | 24.38  | 39.19  | 39.51  | 29.38  | 14.00 | 1.80  | 0.07  |
|  | <b>FCoI-RA-lo-R</b> |        |        |        |        |       |       |       |
|  |                     | 43.88  | 102.44 | 56.61  | 40.90  | 7.00  | 2.54  | 0.01* |
|  | <b>FCoI-RA-lo-L</b> |        |        |        |        |       |       |       |
|  |                     | 16.64  | 16.00  | 46.35  | 52.45  | 22.00 | 0.95  | 0.34  |
|  | <b>FCoI-AEO-R</b>   |        |        |        |        |       |       |       |
|  |                     | 38.10  | 73.02  | 47.25  | 43.36  | 17.00 | 1.48  | 0.14  |
|  | <b>FCoI-AEO-L</b>   |        |        |        |        |       |       |       |
|  |                     | -30.30 | 35.56  | -22.26 | 36.80  | 30.00 | 0.11  | 0.92  |
|  | <b>FCoSI-BB</b>     |        |        |        |        |       |       |       |
|  |                     | -4.61  | 22.95  | -1.13  | 27.12  | 30.00 | -0.11 | 0.92  |
|  | <b>FCoSI-RA-up</b>  |        |        |        |        |       |       |       |
|  |                     | 2.15   | 34.22  | -12.03 | 28.00  | 20.00 | -1.16 | 0.24  |
|  | <b>FCoSI-RA-lo</b>  |        |        |        |        |       |       |       |
|  |                     | -6.54  | 45.45  | -2.01  | 31.99  | 29.00 | 0.21  | 0.83  |
|  | <b>FCoSI-AEO</b>    |        |        |        |        |       |       |       |

AcI— activity index; AEO— abdominal external oblique muscle; ASI— asymmetry index; BB — biceps brachii muscle; ES—effect size; FCAI— Functional Clenching Activity Index; FCI — Functional Clenching Index;; FCoI— Functional Contraction Index; FCoSI— Functional Contraction Symmetry Index; FCSI— Functional Clenching Symmetry Index; L— left side; MM — the superficial part of the masseter muscle; MVC— maximum voluntary contraction; n— individuals in the sample; POC— percentage overlapping coefficient; R— right side; RA-lo — the lower part of the rectus abdominis muscle; RA-up— the upper part of the rectus abdominis muscle; SCM — the middle part of the sternocleidomastoid muscle; SD — standard deviation; TA — the anterior part of the temporalis muscle; TC— torque coefficient; U— the difference between the two rank totals; UT— the upper part of the trapezius muscle; Z— the Mann-Whitney U test; \* significant difference.

**Table S10.** Comparison of bioelectrical activity findings of postural muscles and the arm muscles in emmetropic subjects.

|                          |           | Without Paralysis of Accommodation |       | Accommodation Paralysis in The Right Eye |       | Accommodation Paralysis in The Left Eye |       | H     | P    |
|--------------------------|-----------|------------------------------------|-------|------------------------------------------|-------|-----------------------------------------|-------|-------|------|
|                          |           | Mean                               | SD    | Mean                                     | SD    | Mean                                    | SD    |       |      |
| <b>Lying Position</b>    | BB-R      | 4.11                               | 2.00  | 3.80                                     | 1.36  | 4.99                                    | 4.45  | 0.014 | 0.99 |
|                          | BB-L      | 4.68                               | 6.52  | 4.45                                     | 5.01  | 3.75                                    | 3.77  | 0.03  | 0.98 |
|                          | BB-tot    | 4.39                               | 3.90  | 4.12                                     | 2.97  | 4.37                                    | 3.58  | 0.014 | 0.99 |
|                          | BB-R-%    | 58.86                              | 18.25 | 57.18                                    | 19.50 | 61.92                                   | 15.81 | 0.32  | 0.85 |
|                          | BB-L-%    | 41.14                              | 18.25 | 42.82                                    | 19.50 | 38.08                                   | 15.81 | 0.32  | 0.85 |
|                          | AsI-BB    | 17.71                              | 36.49 | 14.35                                    | 39.00 | 23.85                                   | 31.62 | 0.32  | 0.85 |
|                          | RA-up-R   | 7.38                               | 3.21  | 10.04                                    | 7.81  | 10.70                                   | 8.36  | 0.39  | 0.82 |
|                          | RA-up-L   | 6.52                               | 3.26  | 7.25                                     | 4.86  | 12.90                                   | 12.52 | 0.68  | 0.71 |
|                          | RA-lo-R   | 4.91                               | 1.73  | 4.89                                     | 3.60  | 5.47                                    | 3.94  | 0.66  | 0.71 |
|                          | RA-lo-L   | 10.81                              | 9.67  | 8.37                                     | 8.21  | 7.53                                    | 9.08  | 1.08  | 0.58 |
|                          | RA-up-tot | 10.64                              | 4.48  | 13.67                                    | 9.57  | 17.15                                   | 14.41 | 0.4   | 0.82 |
|                          | RA-lo-tot | 10.32                              | 5.19  | 9.08                                     | 6.69  | 9.24                                    | 7.64  | 0.13  | 0.93 |
|                          | RA-up-R-% | 26.61                              | 9.07  | 31.98                                    | 16.25 | 30.01                                   | 6.52  | 0.05  | 0.97 |
|                          | RA-up-L-% | 22.99                              | 7.58  | 24.53                                    | 9.01  | 33.36                                   | 13.79 | 0.24  | 0.88 |
|                          | RA-lo-R-% | 18.73                              | 7.96  | 17.23                                    | 9.11  | 17.70                                   | 10.10 | 3.27  | 0.19 |
|                          | RA-lo-L-% | 31.67                              | 18.98 | 26.26                                    | 17.90 | 18.92                                   | 11.83 | 0.24  | 0.88 |
|                          | AsI-RA-up | 6.18                               | 19.03 | 9.01                                     | 24.74 | -1.55                                   | 18.48 | 1.03  | 0.59 |
|                          | AsI-RA-lo | -17.69                             | 40.54 | -14.28                                   | 31.82 | -1.52                                   | 34.61 | 0.96  | 0.62 |
|                          | AEO-R     | 6.71                               | 5.16  | 7.26                                     | 11.07 | 6.79                                    | 8.96  | 1.29  | 0.52 |
|                          | AEO-L     | 5.24                               | 4.22  | 3.90                                     | 1.22  | 7.54                                    | 11.06 | 0.03  | 0.98 |
| <b>Standing Position</b> | AEO-tot   | 5.97                               | 4.59  | 5.58                                     | 5.82  | 7.17                                    | 6.68  | 0.55  | 0.75 |
|                          | AEO-R-%   | 55.24                              | 11.06 | 53.06                                    | 15.34 | 49.90                                   | 21.95 | 0.68  | 0.71 |
|                          | AEO-L-%   | 44.76                              | 11.06 | 46.94                                    | 15.34 | 50.10                                   | 21.95 | 0.68  | 0.71 |
|                          | AsI-AEO   | 10.48                              | 22.12 | 6.12                                     | 30.68 | -0.21                                   | 43.90 | 0.67  | 0.71 |
|                          | BB-R      | 2.45                               | 0.71  | 2.29                                     | 0.52  | 2.59                                    | 1.22  | 0.1   | 0.95 |
|                          | BB-L      | 1.77                               | 0.98  | 2.00                                     | 1.55  | 1.55                                    | 0.56  | 0.24  | 0.88 |
|                          | BB-tot    | 2.11                               | 0.62  | 2.14                                     | 0.70  | 2.07                                    | 0.58  | 0.03  | 0.98 |
|                          | BB-R-%    | 59.10                              | 12.02 | 57.28                                    | 16.04 | 61.28                                   | 13.58 | 0.55  | 0.75 |
|                          | BB-L-%    | 40.90                              | 12.02 | 42.72                                    | 16.04 | 38.72                                   | 13.58 | 0.55  | 0.75 |
|                          | AsI-BB    | 18.20                              | 24.05 | 14.57                                    | 32.09 | 22.55                                   | 27.17 | 0.55  | 0.75 |
|                          | RA-up-R   | 8.72                               | 6.10  | 7.92                                     | 4.06  | 8.25                                    | 5.25  | 0.1   | 0.95 |
|                          | RA-up-L   | 7.46                               | 3.85  | 6.90                                     | 2.61  | 8.88                                    | 5.00  | 0.23  | 0.89 |
|                          | RA-lo-R   | 4.14                               | 0.59  | 4.23                                     | 0.99  | 3.90                                    | 0.78  | 0.65  | 0.72 |
|                          | RA-lo-L   | 5.81                               | 8.47  | 5.16                                     | 3.81  | 3.05                                    | 1.06  | 1.78  | 0.4  |
|                          | RA-up-tot | 12.44                              | 7.92  | 11.37                                    | 5.00  | 12.70                                   | 6.79  | 0.09  | 0.95 |
|                          | RA-lo-tot | 7.05                               | 4.58  | 6.81                                     | 2.51  | 5.42                                    | 1.10  | 1.19  | 0.55 |

|                     |           |        |        |        |        |        |        |      |      |
|---------------------|-----------|--------|--------|--------|--------|--------|--------|------|------|
| Sitting<br>Position | RA-up-R-% | 32.73  | 11.05  | 31.74  | 10.63  | 32.76  | 10.20  | 0.22 | 0.89 |
|                     | RA-up-L-% | 29.52  | 7.00   | 28.75  | 7.99   | 35.57  | 12.23  | 1.45 | 0.48 |
|                     | RA-lo-R-% | 18.55  | 7.42   | 18.38  | 5.66   | 17.60  | 5.29   | 0.05 | 0.97 |
|                     | RA-lo-L-% | 19.20  | 15.99  | 21.13  | 12.50  | 14.06  | 6.63   | 1.81 | 0.4  |
|                     | ASI-RA-up | 3.71   | 15.15  | 4.12   | 17.55  | -3.07  | 27.60  | 0    | 0.99 |
|                     | ASI-RA-lo | 6.00   | 32.53  | -1.04  | 25.19  | 13.52  | 15.44  | 2.01 | 0.36 |
|                     | AEO-R     | 9.04   | 5.57   | 9.46   | 6.28   | 8.92   | 5.61   | 0.05 | 0.97 |
|                     | AEO-L     | 7.59   | 3.95   | 8.79   | 6.63   | 7.62   | 4.48   | 0.05 | 0.97 |
|                     | AEO-tot   | 8.31   | 4.54   | 9.12   | 6.27   | 8.27   | 4.70   | 0.07 | 0.96 |
|                     | AEO-R-%   | 52.53  | 8.91   | 51.95  | 8.34   | 52.48  | 10.24  | 0.32 | 0.85 |
|                     | AEO-L-%   | 47.47  | 8.91   | 48.05  | 8.34   | 47.52  | 10.24  | 0.32 | 0.85 |
|                     | AsI-AEO   | 5.05   | 17.83  | 3.91   | 16.68  | 4.96   | 20.47  | 0.32 | 0.85 |
|                     | BB-R      | 2.23   | 0.69   | 2.21   | 0.70   | 2.39   | 0.66   | 0.32 | 0.85 |
|                     | BB-L      | 1.46   | 0.89   | 1.87   | 0.98   | 1.61   | 0.61   | 1.37 | 0.5  |
|                     | BB-tot    | 1.84   | 0.56   | 2.04   | 0.47   | 2.00   | 0.46   | 1.17 | 0.55 |
|                     | BB-R-%    | 61.52  | 13.33  | 55.73  | 16.40  | 60.14  | 10.35  | 0.53 | 0.76 |
|                     | BB-L-%    | 38.48  | 13.33  | 44.27  | 16.40  | 39.86  | 10.35  | 0.53 | 0.76 |
|                     | AsI-BB    | 23.04  | 26.65  | 11.46  | 32.79  | 20.27  | 20.69  | 0.53 | 0.76 |
|                     | RA-up-P-R | 6.60   | 4.20   | 7.30   | 3.65   | 6.90   | 3.06   | 1.12 | 0.57 |
|                     | RA-up-L   | 7.72   | 7.26   | 7.04   | 4.80   | 6.10   | 5.35   | 0.6  | 0.73 |
|                     | RA-lo-R   | 3.73   | 1.16   | 4.76   | 3.99   | 3.71   | 1.60   | 0.14 | 0.93 |
|                     | RA-lo-L   | 6.18   | 11.77  | 5.58   | 6.88   | 5.44   | 7.25   | 0.53 | 0.76 |
|                     | RA-up-tot | 10.46  | 5.66   | 10.82  | 5.97   | 9.96   | 5.41   | 0.15 | 0.92 |
|                     | RA-lo-tot | 6.81   | 6.40   | 7.55   | 6.83   | 6.43   | 5.07   | 0.26 | 0.87 |
|                     | RA-up-R-% | 32.28  | 13.45  | 32.22  | 11.07  | 32.80  | 8.42   | 0.14 | 0.93 |
|                     | RA-up-L-% | 30.79  | 5.43   | 29.24  | 10.50  | 28.44  | 16.50  | 0.17 | 0.91 |
|                     | RA-lo-R-% | 19.38  | 8.05   | 19.08  | 8.43   | 17.66  | 4.71   | 0.45 | 0.79 |
|                     | RA-lo-L-% | 17.56  | 13.23  | 19.47  | 15.28  | 21.10  | 20.21  | 0.01 | 0.99 |
|                     | AsI-RA-up | -1.58  | 30.28  | 4.78   | 12.06  | 16.67  | 35.72  | 0.66 | 0.71 |
|                     | AsI-RA-lo | 11.18  | 36.31  | 7.81   | 28.43  | 6.89   | 34.76  | 0.14 | 0.93 |
|                     | AEO-R     | 3.14   | 0.73   | 38.72  | 107.36 | 2.67   | 0.56   | 1.67 | 0.43 |
|                     | AEO-L     | 3.63   | 1.11   | 3.58   | 1.20   | 3.48   | 0.95   | 0.09 | 0.95 |
|                     | AEO-tot   | 3.39   | 0.83   | 21.15  | 53.87  | 3.07   | 0.70   | 0.65 | 0.72 |
|                     | AEO-R-%   | 46.86  | 6.42   | 52.13  | 18.03  | 43.79  | 4.83   | 2.51 | 0.28 |
|                     | AEO-L-%   | 53.14  | 6.42   | 47.87  | 18.03  | 56.21  | 4.83   | 2.51 | 0.28 |
|                     | AsI-AEO   | -6.28  | 12.83  | 4.27   | 36.06  | -12.42 | 9.66   | 2.51 | 0.28 |
|                     | BB-R      | 477.53 | 359.67 | 558.33 | 351.20 | 662.72 | 399.49 | 1.07 | 0.58 |
|                     | BB-L      | 618.89 | 390.92 | 695.78 | 357.44 | 776.61 | 417.01 | 1.15 | 0.56 |

|                                              |                     |        |        |        |        |        |        |      |       |
|----------------------------------------------|---------------------|--------|--------|--------|--------|--------|--------|------|-------|
| <b>Maximum<br/>Voluntary<br/>Contraction</b> | BB-tot              | 548.21 | 329.99 | 627.06 | 297.76 | 719.67 | 364.53 | 1.02 | 0.6   |
|                                              | BB-R-%              | 41.85  | 12.78  | 43.45  | 13.26  | 45.34  | 11.75  | 0.65 | 0.72  |
|                                              | BB-L-%              | 58.15  | 12.78  | 56.55  | 13.26  | 54.66  | 11.75  | 0.65 | 0.72  |
|                                              | AsI-BB              | -16.31 | 25.56  | -13.11 | 26.51  | -9.32  | 23.50  | 0.65 | 0.72  |
|                                              | RA-up-R             | 97.55  | 78.76  | 88.09  | 60.46  | 91.94  | 51.88  | 0.24 | 0.88  |
|                                              | RA-up-L             | 109.19 | 80.82  | 97.88  | 60.37  | 110.13 | 73.91  | 0.03 | 0.98  |
|                                              | RA-lo-R             | 69.26  | 72.09  | 68.36  | 63.25  | 77.37  | 84.26  | 0.07 | 0.961 |
|                                              | RA-lo-L             | 300.63 | 601.07 | 94.86  | 147.01 | 107.68 | 182.27 | 0.05 | 0.97  |
|                                              | RA-up-tot           | 152.14 | 117.79 | 137.03 | 88.76  | 147.00 | 87.08  | 0.15 | 0.92  |
|                                              | RA-lo-tot           | 219.57 | 315.55 | 115.79 | 135.53 | 131.21 | 174.84 | 0.14 | 0.93  |
|                                              | RA-up-R-%           | 26.52  | 12.06  | 28.45  | 7.24   | 28.35  | 8.90   | 0.03 | 0.98  |
|                                              | RA-up-L-%           | 28.36  | 11.14  | 30.28  | 8.60   | 31.68  | 7.95   | 0.22 | 0.89  |
|                                              | RA-lo-R-%           | 17.09  | 7.28   | 19.64  | 4.53   | 19.44  | 4.20   | 0.38 | 0.82  |
|                                              | RA-lo-L-%           | 28.03  | 26.27  | 21.64  | 8.55   | 20.52  | 10.21  | 0.29 | 0.86  |
|                                              | ASI-RA-up           | -6.91  | 13.62  | -2.67  | 19.11  | -6.37  | 18.05  | 0.12 | 0.94  |
|                                              | ASI-RA-lo           | -8.92  | 37.90  | -3.16  | 14.82  | 0.51   | 15.72  | 0.65 | 0.72  |
|                                              | AEO-R               | 65.49  | 71.55  | 55.77  | 42.90  | 79.87  | 76.96  | 0.91 | 0.63  |
|                                              | AEO-L               | 87.22  | 114.21 | 70.19  | 48.61  | 131.52 | 205.10 | 0.23 | 0.89  |
|                                              | AEO-tot             | 76.35  | 92.78  | 62.98  | 45.51  | 105.70 | 138.76 | 0.45 | 0.79  |
|                                              | AEO-R-%             | 46.62  | 5.27   | 43.00  | 4.49   | 45.44  | 9.78   | 2.95 | 0.22  |
|                                              | AEO-L-%             | 53.38  | 5.27   | 57.00  | 4.49   | 54.56  | 9.78   | 2.95 | 0.22  |
|                                              | AsI-AEO             | -6.76  | 10.54  | -14.00 | 8.98   | -9.13  | 19.56  | 2.95 | 0.22  |
|                                              | <b>FCoI-BB-R</b>    | 127.63 | 107.12 | 157.82 | 126.51 | 181.54 | 148.94 | 0.53 | 0.76  |
|                                              | <b>FCoI-BB-L</b>    | 321.70 | 337.60 | 360.44 | 334.80 | 418.28 | 425.19 | 0.13 | 0.93  |
|                                              | <b>FCoI-RA-up-R</b> | 15.24  | 14.80  | 16.30  | 20.08  | 13.77  | 14.35  | 0.09 | 0.95  |
|                                              | <b>FCoI-RA-up-L</b> | 19.83  | 18.39  | 17.95  | 16.80  | 17.53  | 19.71  | 0.39 | 0.82  |
|                                              | <b>FCoI-RA-lo-R</b> | 18.06  | 26.95  | 22.12  | 28.35  | 24.38  | 39.19  | 0.13 | 0.93  |
|                                              | <b>FCoI-RA-lo-L</b> | 83.55  | 164.86 | 35.50  | 84.69  | 43.88  | 102.44 | 1.08 | 0.58  |
|                                              | <b>FCoI-AEO-R</b>   | 14.77  | 17.92  | 13.15  | 11.52  | 16.64  | 16.00  | 0.86 | 0.65  |
|                                              | <b>FCoI-AEO-L</b>   | 28.13  | 43.03  | 18.96  | 12.87  | 38.10  | 73.02  | 0.39 | 0.82  |
|                                              | <b>FCoSI-BB</b>     | -32.27 | 36.44  | -27.06 | 31.60  | -30.30 | 35.56  | 0.26 | 0.89  |
|                                              | <b>FCoSI-RA-up</b>  | -13.02 | 19.41  | -11.80 | 24.82  | -4.61  | 22.95  | 0.88 | 0.64  |
|                                              | <b>FCoSI-RA-lo</b>  | 9.19   | 57.75  | 11.36  | 37.49  | 2.15   | 34.22  | 0.52 | 0.77  |
|                                              | <b>FCoSI-AEO</b>    | -16.18 | 28.00  | -18.90 | 29.90  | -6.54  | 45.45  | 0.95 | 0.62  |

AcI— activity index; AEO— abdominal external oblique muscle; AsI— asymmetry index; BB — biceps brachii muscle; ES—effect size; FCAI— Functional Clenching Activity Index; FCI — Functional Clenching Index; FCoI— Functional Contraction Index; FCoSI— Functional Contraction Symmetry Index; FCSI— Functional Clenching Symmetry Index; L— left side; MM — the superficial part of the masseter muscle; MVC— maximum voluntary contraction; n— individuals in the sample; POC— percentage overlapping coefficient; R— right side; RA-lo — the lower part of the rectus abdominis muscle; RA-up— the upper part of the rectus abdominis muscle; SCM — the middle part of the sternocleidomastoid muscle; SD — standard deviation; TA — the anterior part of the temporalis muscle; TC— torque coefficient; U— the difference between the two rank totals; UT— the upper part of the trapezius muscle; H— the Kruskal-Wallis test.

**Table S11.** Comparison of bioelectrical activity findings of postural muscles and the arm muscles in myopic subjects.

|                      |               | Without Paralysis<br>of<br>Accommodation |       | Accommodation<br>Paralysis in The<br>Right Eye |       | Accommodation<br>Paralysis in The<br>Left Eye |       | H    | P    |
|----------------------|---------------|------------------------------------------|-------|------------------------------------------------|-------|-----------------------------------------------|-------|------|------|
|                      |               | Mean                                     | SD    | Mean                                           | SD    | Mean                                          | SD    |      |      |
| Lying<br>Position    | BB-R          | 3.76                                     | 2.38  | 3.68                                           | 2.02  | 2.87                                          | 1.14  | 0.68 | 0.71 |
|                      | BB-L          | 2.78                                     | 1.37  | 3.52                                           | 4.23  | 2.21                                          | 1.18  | 1.12 | 0.57 |
|                      | BB-tot        | 3.20                                     | 1.56  | 3.56                                           | 2.95  | 2.52                                          | 0.90  | 1.09 | 0.57 |
|                      | BB-R-%        | 51.87                                    | 21.41 | 52.49                                          | 18.34 | 56.10                                         | 16.61 | 0.14 | 0.93 |
|                      | BB-L-%        | 39.58                                    | 18.39 | 39.98                                          | 15.96 | 35.69                                         | 10.32 | 0.14 | 0.93 |
|                      | AsI-BB        | 16.24                                    | 31.98 | 16.13                                          | 27.50 | 23.56                                         | 13.22 | 0.14 | 0.93 |
|                      | RA-up-R       | 7.24                                     | 3.16  | 6.12                                           | 2.85  | 5.76                                          | 2.89  | 1.14 | 0.56 |
|                      | RA-up-L       | 6.31                                     | 2.75  | 6.22                                           | 3.45  | 5.72                                          | 2.85  | 0.45 | 0.79 |
|                      | RA-lo-R       | 3.52                                     | 0.87  | 3.44                                           | 1.77  | 4.52                                          | 4.29  | 0.05 | 0.97 |
|                      | RA-lo-L       | 4.52                                     | 2.47  | 2.93                                           | 1.25  | 2.73                                          | 1.58  | 1.52 | 0.46 |
|                      | RA-up-<br>tot | 10.37                                    | 3.42  | 9.09                                           | 3.29  | 8.46                                          | 3.46  | 0.72 | 0.69 |
|                      | RA-lo-tot     | 5.68                                     | 1.67  | 4.85                                           | 2.04  | 5.84                                          | 4.74  | 0.14 | 0.93 |
|                      | RA-up-R-<br>% | 31.19                                    | 13.44 | 30.41                                          | 12.62 | 29.55                                         | 12.94 | 0.45 | 0.79 |
|                      | RA-up-L-<br>% | 26.73                                    | 9.01  | 30.26                                          | 14.05 | 29.08                                         | 12.38 | 0.21 | 0.9  |
|                      | RA-lo-R-<br>% | 17.03                                    | 5.45  | 17.21                                          | 7.74  | 20.69                                         | 12.67 | 0.36 | 0.83 |
|                      | RA-lo-L-<br>% | 17.83                                    | 5.30  | 13.77                                          | 7.15  | 13.38                                         | 4.71  | 2.46 | 0.29 |
|                      | AsI-RA-<br>up | 10.17                                    | 24.80 | 2.69                                           | 30.14 | 4.43                                          | 28.18 | 0.05 | 0.97 |
|                      | AsI-RA-<br>lo | 2.74                                     | 25.31 | 14.31                                          | 23.15 | 19.25                                         | 21.37 | 3.57 | 0.16 |
|                      | AEO-R         | 3.46                                     | 2.30  | 3.33                                           | 1.30  | 3.29                                          | 1.85  | 1.12 | 0.57 |
|                      | AEO-L         | 5.35                                     | 2.83  | 3.75                                           | 1.45  | 3.48                                          | 1.76  | 0.04 | 0.98 |
|                      | AEO-tot       | 3.99                                     | 1.42  | 3.40                                           | 1.51  | 3.40                                          | 1.76  | 0.04 | 0.98 |
|                      | AEO-R-%       | 36.17                                    | 10.05 | 42.87                                          | 14.53 | 44.29                                         | 12.87 | 6.7  | 0.03 |
|                      | AEO-L-%       | 56.82                                    | 16.33 | 47.93                                          | 14.08 | 46.79                                         | 13.99 | 6.7  | 0.03 |
|                      | AsI-AEO       | -15.16                                   | 29.01 | -0.64                                          | 16.86 | -0.45                                         | 11.53 | 6.7  | 0.03 |
| Standing<br>Position | BB-R          | 2.23                                     | 0.85  | 2.21                                           | 0.67  | 2.46                                          | 1.58  | 0.44 | 0.79 |
|                      | BB-L          | 1.14                                     | 0.37  | 1.24                                           | 0.53  | 2.14                                          | 3.01  | 0.84 | 0.65 |
|                      | BB-tot        | 1.65                                     | 0.57  | 1.72                                           | 0.55  | 2.29                                          | 2.27  | 0.84 | 0.65 |
|                      | BB-R-%        | 58.70                                    | 20.27 | 58.70                                          | 16.83 | 55.33                                         | 18.72 | 0.29 | 0.86 |
|                      | BB-L-%        | 32.20                                    | 11.63 | 32.79                                          | 10.73 | 35.61                                         | 14.47 | 0.29 | 0.86 |
|                      | AsI-BB        | 29.90                                    | 17.77 | 27.06                                          | 13.50 | 20.65                                         | 21.01 | 0.29 | 0.86 |
|                      | RA-up-R       | 7.07                                     | 3.51  | 5.83                                           | 2.42  | 6.40                                          | 2.72  | 0.36 | 0.83 |
|                      | RA-up-L       | 7.17                                     | 3.22  | 6.40                                           | 2.88  | 6.70                                          | 2.79  | 0.43 | 0.8  |
|                      | RA-lo-R       | 4.80                                     | 2.63  | 4.30                                           | 1.90  | 6.69                                          | 4.07  | 2.03 | 0.36 |
|                      | RA-lo-L       | 3.69                                     | 2.75  | 3.20                                           | 2.58  | 5.05                                          | 3.54  | 2.1  | 0.34 |
|                      | RA-up-<br>tot | 10.54                                    | 5.16  | 9.04                                           | 3.83  | 9.75                                          | 4.06  | 0.36 | 0.83 |
|                      | RA-lo-tot     | 6.62                                     | 3.91  | 5.89                                           | 3.01  | 9.19                                          | 5.30  | 2.27 | 0.32 |

|                     |           |        |        |        |        |         |         |      |      |
|---------------------|-----------|--------|--------|--------|--------|---------|---------|------|------|
| Sitting<br>Position | RA-up-R-% | 27.25  | 8.41   | 27.34  | 8.57   | 24.47   | 8.80    | 1.66 | 0.43 |
|                     | RA-up-L-% | 28.50  | 8.70   | 29.91  | 9.91   | 25.30   | 9.02    | 2.83 | 0.24 |
|                     | RA-lo-R-% | 20.85  | 9.36   | 20.85  | 7.96   | 24.70   | 10.87   | 0.94 | 0.62 |
|                     | RA-lo-L-% | 15.20  | 6.22   | 13.48  | 5.94   | 17.08   | 9.44    | 0.83 | 0.66 |
|                     | ASI-RA-up | 2.05   | 13.31  | -2.21  | 8.42   | -0.16   | 8.42    | 1.61 | 0.44 |
|                     | ASI-RA-lo | 16.68  | 16.75  | 21.07  | 18.92  | 19.95   | 22.72   | 1.19 | 0.91 |
|                     | AEO-R     | 5.89   | 4.27   | 5.34   | 2.94   | 5.31    | 2.12    | 0.95 | 0.62 |
|                     | AEO-L     | 5.82   | 2.79   | 5.29   | 3.32   | 5.41    | 2.37    | 0.45 | 0.79 |
|                     | AEO-tot   | 5.81   | 2.65   | 5.20   | 2.66   | 5.30    | 1.88    | 0.23 | 0.89 |
|                     | AEO-R-%   | 42.66  | 18.50  | 45.24  | 15.71  | 45.69   | 15.24   | 0.39 | 0.82 |
|                     | AEO-L-%   | 47.40  | 19.90  | 47.06  | 15.82  | 45.75   | 15.22   | 0.39 | 0.82 |
|                     | AsI-AEO   | -2.18  | 27.68  | 1.82   | 25.08  | 3.09    | 20.52   | 0.39 | 0.82 |
|                     | BB-R      | 2.09   | 0.88   | 2.09   | 0.71   | 1.95    | 0.68    | 0.27 | 0.87 |
|                     | BB-L      | 1.20   | 0.49   | 1.32   | 0.86   | 1.32    | 0.55    | 1.21 | 0.54 |
|                     | BB-tot    | 1.62   | 0.63   | 1.69   | 0.69   | 1.63    | 0.54    | 0.1  | 0.95 |
|                     | BB-R-%    | 57.27  | 20.88  | 57.31  | 17.47  | 55.61   | 17.18   | 0.45 | 0.79 |
|                     | BB-L-%    | 32.82  | 12.62  | 34.38  | 12.88  | 35.69   | 11.95   | 0.45 | 0.79 |
|                     | AsI-BB    | 27.03  | 17.71  | 24.11  | 19.00  | 21.72   | 15.24   | 0.45 | 0.79 |
|                     | RA-up-P-R | 5.13   | 2.15   | 5.17   | 2.07   | 5.29    | 2.43    | 0    | 1    |
|                     | RA-up-L   | 6.20   | 2.31   | 6.90   | 4.22   | 8.70    | 8.87    | 0.05 | 0.97 |
|                     | RA-lo-R   | 2.93   | 0.81   | 3.00   | 1.22   | 3.42    | 1.97    | 0.16 | 0.92 |
|                     | RA-lo-L   | 2.81   | 1.88   | 2.26   | 0.51   | 1.92    | 1.01    | 0.5  | 0.77 |
|                     | RA-up-tot | 8.19   | 3.27   | 8.62   | 3.81   | 9.60    | 5.33    | 0.21 | 0.9  |
|                     | RA-lo-tot | 4.32   | 0.75   | 4.00   | 1.66   | 4.41    | 2.38    | 0.36 | 0.83 |
|                     | RA-up-R-% | 28.17  | 9.26   | 27.32  | 9.02   | 27.42   | 12.76   | 0.03 | 0.98 |
|                     | RA-up-L-% | 33.33  | 8.92   | 34.54  | 14.61  | 35.44   | 18.35   | 0.09 | 0.95 |
|                     | RA-lo-R-% | 17.91  | 9.16   | 17.59  | 8.08   | 18.84   | 10.53   | 0.36 | 0.83 |
|                     | RA-lo-L-% | 14.31  | 4.79   | 12.07  | 5.03   | 10.40   | 4.38    | 0.69 | 0.7  |
|                     | AsI-RA-up | -1.53  | 16.65  | -7.29  | 18.22  | -6.44   | 30.53   | 0.47 | 0.79 |
|                     | AsI-RA-lo | 19.97  | 17.09  | 17.04  | 10.02  | 24.58   | 15.97   | 2.23 | 0.32 |
|                     | AEO-R     | 2.40   | 1.01   | 2.65   | 0.94   | 2.74    | 0.98    | 0.94 | 0.62 |
|                     | AEO-L     | 3.83   | 1.88   | 4.27   | 2.59   | 3.95    | 1.52    | 0.1  | 0.95 |
|                     | AEO-tot   | 3.11   | 1.34   | 3.45   | 1.70   | 3.34    | 1.18    | 0.11 | 0.94 |
|                     | AEO-R-%   | 35.16  | 14.22  | 37.05  | 11.13  | 38.75   | 12.11   | 1.65 | 0.55 |
|                     | AEO-L-%   | 53.55  | 20.97  | 54.85  | 15.04  | 52.02   | 15.66   | 1.17 | 0.55 |
|                     | AsI-AEO   | -17.19 | 18.06  | -14.70 | 18.17  | -10.51  | 14.91   | 1.17 | 0.55 |
|                     | BB-R      | 825.12 | 471.41 | 683.55 | 341.43 | 834.93  | 348.90  | 1.63 | 0.44 |
|                     | BB-L      | 858.94 | 384.31 | 805.66 | 390.91 | 1355.43 | 1546.21 | 0.72 | 0.69 |

|                                              |                     |        |        |        |        |         |        |      |      |
|----------------------------------------------|---------------------|--------|--------|--------|--------|---------|--------|------|------|
| <b>Maximum<br/>Voluntary<br/>Contraction</b> | BB-tot              | 836.57 | 381.18 | 738.77 | 313.15 | 1088.55 | 794.15 | 2.15 | 0.34 |
|                                              | BB-R-%              | 43.23  | 17.80  | 41.27  | 15.54  | 41.60   | 18.45  | 0.36 | 0.83 |
|                                              | BB-L-%              | 47.21  | 18.98  | 50.83  | 17.81  | 50.07   | 19.98  | 0.36 | 0.83 |
|                                              | AsI-BB              | -1.04  | 26.82  | -6.06  | 27.98  | -4.68   | 33.05  | 0.36 | 0.83 |
|                                              | RA-up-R             | 126.78 | 66.40  | 92.34  | 46.92  | 116.75  | 63.47  | 1.99 | 0.36 |
|                                              | RA-up-L             | 136.47 | 90.76  | 114.70 | 77.57  | 126.57  | 49.71  | 1.4  | 0.49 |
|                                              | RA-lo-R             | 131.72 | 95.12  | 109.39 | 74.80  | 156.22  | 121.83 | 0.72 | 0.69 |
|                                              | RA-lo-L             | 150.06 | 73.42  | 105.75 | 61.83  | 139.09  | 98.93  | 0.74 | 0.69 |
|                                              | RA-up-tot           | 194.79 | 106.93 | 149.09 | 71.81  | 178.30  | 86.65  | 1.99 | 0.36 |
|                                              | RA-lo-tot           | 206.68 | 126.19 | 161.56 | 100.98 | 225.17  | 169.88 | 0.76 | 0.68 |
|                                              | RA-up-R-%           | 22.89  | 7.23   | 20.97  | 8.07   | 21.24   | 6.99   | 0.83 | 0.66 |
|                                              | RA-up-L-%           | 24.07  | 9.94   | 25.00  | 12.35  | 24.36   | 8.53   | 0.14 | 0.93 |
|                                              | RA-lo-R-%           | 20.41  | 10.83  | 22.49  | 9.52   | 23.62   | 9.07   | 0.83 | 0.66 |
|                                              | RA-lo-L-%           | 24.04  | 7.33   | 23.46  | 9.10   | 23.16   | 8.19   | 0.14 | 0.93 |
|                                              | AsI-RA-up           | 0.89   | 14.20  | -3.12  | 22.89  | -1.44   | 16.33  | 0.36 | 0.83 |
|                                              | AsI-RA-lo           | -6.21  | 21.45  | -1.03  | 21.92  | 3.17    | 19.44  | 1.17 | 0.55 |
|                                              | AEO-R               | 111.93 | 127.79 | 98.39  | 107.79 | 123.96  | 114.30 | 0.68 | 0.71 |
|                                              | AEO-L               | 162.56 | 89.60  | 110.64 | 91.08  | 134.00  | 83.44  | 0.76 | 0.68 |
|                                              | AEO-tot             | 136.96 | 96.70  | 103.01 | 97.40  | 128.73  | 92.82  | 1.12 | 0.57 |
|                                              | AEO-R-%             | 36.43  | 17.48  | 39.49  | 11.83  | 40.92   | 16.30  | 0.42 | 0.80 |
|                                              | AEO-L-%             | 53.51  | 22.40  | 52.99  | 14.61  | 49.88   | 18.18  | 0.42 | 0.80 |
|                                              | AsI-AEO             | -14.63 | 30.82  | -9.03  | 22.41  | -5.81   | 25.31  | 0.42 | 0.80 |
|                                              | <b>FCoI-BB-R</b>    | 260.56 | 141.83 | 218.48 | 155.73 | 305.95  | 153.26 | 3.44 | 0.17 |
|                                              | <b>FCoI-BB-L</b>    | 404.66 | 146.74 | 351.88 | 219.27 | 796.52  | 945.94 | 3.5  | 0.17 |
|                                              | <b>FCoI-RA-up-R</b> | 22.04  | 15.58  | 14.87  | 5.37   | 20.31   | 13.37  | 1.7  | 0.42 |
|                                              | <b>FCoI-RA-up-L</b> | 26.96  | 19.54  | 20.35  | 14.61  | 25.24   | 13.86  | 0.96 | 0.61 |
|                                              | <b>FCoI-RA-lo-R</b> | 42.40  | 31.61  | 32.12  | 23.30  | 39.51   | 29.38  | 0.68 | 0.71 |
|                                              | <b>FCoI-RA-lo-L</b> | 60.46  | 50.35  | 47.09  | 33.40  | 56.61   | 40.90  | 0.39 | 0.82 |
|                                              | <b>FCoI-AEO-R</b>   | 39.21  | 41.32  | 33.29  | 40.94  | 46.35   | 52.45  | 1.43 | 0.48 |
|                                              | <b>FCoI-AEO-L</b>   | 40.94  | 24.59  | 35.63  | 34.82  | 47.25   | 43.36  | 0.32 | 0.85 |
|                                              | <b>FCoSI-BB</b>     | -11.79 | 35.85  | -15.98 | 33.77  | -22.26  | 36.80  | 0.2  | 0.9  |
|                                              | <b>FCoSI-RA-up</b>  | -6.60  | 25.22  | -1.61  | 30.77  | -1.13   | 27.12  | 0.14 | 0.93 |
|                                              | <b>FCoSI-RA-lo</b>  | -2.12  | 34.13  | -9.92  | 32.49  | -12.03  | 28.00  | 0.47 | 0.79 |
|                                              | <b>FCoSI-AEO</b>    | 8.97   | 39.04  | -3.15  | 29.13  | -2.01   | 31.99  | 1.12 | 0.57 |

AcI— activity index; AEO— abdominal external oblique muscle; AsI— asymmetry index; BB — biceps brachii muscle; ES—effect size; FCAI— Functional Clenching Activity Index; FCI — Functional Clenching Index; FCoI— Functional Contraction Index; FCoSI— Functional Contraction Symmetry Index; FCSI— Functional Clenching Symmetry Index; L— left side; MM — the superficial part of the masseter muscle; MVC— maximum voluntary contraction; n— individuals in the sample; POC— percentage overlapping coefficient; R— right side; RA-lo — the lower part of the rectus abdominis muscle; RA-up— the upper part of the rectus abdominis muscle; SCM — the middle part of the sternocleidomastoid muscle; SD — standard deviation; TA — the anterior part of the temporalis muscle; TC— torque coefficient; U— the difference between the two rank totals; UT— the upper part of the trapezius muscle; H— the Kruskal-Wallis test; \* significant difference.
